# Supplementary material
Source: PubMed Central journal article supplement (PMC6056327)

**eTable 1. Diagnosis and procedure codes, ICD-9 CM and CCS, used in classifying patients**

| <b>Diagnoses/Procedures</b>            | <b>DX (ICD9 Codes)</b>                                                                                                                                                                                                                                                                                                                                                                                                                                                                                                                                                                               | <b>DXCCS (CCS Codes for diagnoses)</b> | <b>PRCCS (CCS Codes for procedures)</b> |
|----------------------------------------|------------------------------------------------------------------------------------------------------------------------------------------------------------------------------------------------------------------------------------------------------------------------------------------------------------------------------------------------------------------------------------------------------------------------------------------------------------------------------------------------------------------------------------------------------------------------------------------------------|----------------------------------------|-----------------------------------------|
| Inflammatory Bowel Disease             | 555.0, 555.1, 555.2, 555.9, 556.0, 556.1, 556.2, 556.3, 556.6, 556.8                                                                                                                                                                                                                                                                                                                                                                                                                                                                                                                                 | 144                                    | -                                       |
| Chronic Liver Diseases                 | 070, 070.0, 070.1, 070.2, 070.20, 070.21, 070.22, 070.23, 070.3, 070.30, 070.31, 070.32, 070.33, 070.4, 070.41, 070.42, 070.43, 070.44, 070.49, 070.5, 070.51, 070.52, 070.53, 070.54, 070.59, 070.6, 070.7, 070.70, 070.71, 070.9, 570, 571, 571.0, 571.1, 571.2, 571.3, 571.4, 571.40, 571.41, 571.42, 571.49, 571.5, 571.6, 571.8, 571.9, 572, 572.0, 572.1, 572.2, 572.3, 572.4, 572.8, 573, 573.0, 573.1, 573.2, 573.3, 573.4, 573.5, 573.8, 573.9, 789.5, 567.23, 456.1, 456.21, 571.0, 571.1, 571.2, 571.3, 070.7, 070.41, 070.44, 070.51, 070.54, 070.2, 070.3, 789.5, 789.59, 567.23, 572.2 | 150, 151                               | -                                       |
| Functional/motility disorders          | 530.0, 530.5, 536.2, 536.3, 536.8, 536.9, 564, 564.0, 564.00, 564.01, 564.02, 564.09, 564.1, 564.2, 564.3, 564.4, 564.5, 564.7, 564.8, 564.81, 564.89, 564.9, 306.4                                                                                                                                                                                                                                                                                                                                                                                                                                  | -                                      | -                                       |
| Gastrointestinal hemorrhage            | 456.0, 456.20, 530.21, 530.7, 530.82, 531.0, 531.2, 531.4, 531.6, 532.0, 532.2, 532.4, 532.6, 533.0, 533.2, 533.4, 533.6, 534.0, 534.2, 534.4, 534.6, 535.01, 535.11, 535.21, 535.31, 535.41, 535.51, 535.61, 535.71, 537.83, 562.02, 562.03, 562.12, 562.13, 569.85, 569.86, 569.3, 578.0, 578.1, 578.9, 772.4                                                                                                                                                                                                                                                                                      | 153                                    | -                                       |
| Pancreatic disease                     | 577.0                                                                                                                                                                                                                                                                                                                                                                                                                                                                                                                                                                                                | 152                                    | -                                       |
| <b>Inflammatory Bowel Diseases</b>     |                                                                                                                                                                                                                                                                                                                                                                                                                                                                                                                                                                                                      |                                        |                                         |
| Gastrointestinal or hepatic procedures | -                                                                                                                                                                                                                                                                                                                                                                                                                                                                                                                                                                                                    | -                                      | 68, 69, 70, 71, 72, 73, 74, 75, 76, 77, |

|                                        |                    |   |                                                                                                                         |
|----------------------------------------|--------------------|---|-------------------------------------------------------------------------------------------------------------------------|
|                                        |                    |   | 78, 79, 80, 81, 82, 83, 84, 87, 88, 89, 90, 92, 93, 94, 95, 96, 97, 98, 99, 221                                         |
| Gastrointestinal surgeries             | -                  | - | 72, 73, 75, 78, 79, 89, 90                                                                                              |
| Blood transfusions                     | -                  | - | 222                                                                                                                     |
| Parenteral or enteral nutrition        | -                  | - | 223                                                                                                                     |
| Inflammatory bowel related procedures  | -                  | - | 70, 71, 72, 73, 74, 75, 76, 77, 78, 79, 81, 87, 89, 92, 93, 94, 95, 96, 97, 98, 99                                      |
| <b>Chronic Liver Diseases</b>          |                    |   |                                                                                                                         |
| Gastrointestinal or hepatic procedures | -                  | - | 68, 69, 70, 71, 72, 73, 74, 75, 76, 77, 78, 79, 80, 81, 82, 83, 84, 87, 88, 89, 90, 92, 93, 94, 95, 96, 97, 98, 99, 221 |
| Liver specific surgical procedures     | -                  | - | 68, 88, 83, 56                                                                                                          |
| Blood transfusions                     | -                  | - | 222                                                                                                                     |
| Parenteral or enteral nutrition        | -                  | - | 223                                                                                                                     |
| Liver related procedures               | -                  | - | 68, 82, 83, 88                                                                                                          |
| Liver transplantations                 | 50.5, 50.51, 50.59 | - | -                                                                                                                       |

| <b>Functional/motility disorders</b>   |   |   |                                                                                                                         |
|----------------------------------------|---|---|-------------------------------------------------------------------------------------------------------------------------|
| Gastrointestinal or hepatic procedures | - | - | 68, 69, 70, 71, 72, 73, 74, 75, 76, 77, 78, 79, 80, 81, 82, 83, 84, 87, 88, 89, 90, 92, 93, 94, 95, 96, 97, 98, 99, 221 |
| Blood transfusions                     | - | - | 222                                                                                                                     |
| Parenteral or enteral nutrition        | - | - | 223                                                                                                                     |
| <b>Gastrointestinal hemorrhage</b>     |   |   |                                                                                                                         |
| Gastrointestinal or hepatic procedures | - | - | 68, 69, 70, 71, 72, 73, 74, 75, 76, 77, 78, 79, 80, 81, 82, 83, 84, 87, 88, 89, 90, 92, 93, 94, 95, 96, 97, 98, 99, 221 |
| Blood transfusions                     | - | - | 222                                                                                                                     |
| Parenteral or enteral nutrition        | - | - | 223                                                                                                                     |
| <b>Pancreatic disorders</b>            |   |   |                                                                                                                         |
| Gastrointestinal or hepatic procedures | - | - | 68, 69, 70, 71, 72, 73, 74, 75, 76, 77, 78, 79, 80, 81, 82, 83, 84, 87, 88, 89, 90, 92, 93, 94, 95, 96, 97, 98, 99, 221 |
| Blood transfusions                     | - | - | 222                                                                                                                     |

|                                 |   |   |                |
|---------------------------------|---|---|----------------|
| Parenteral or enteral nutrition | - | - | 223            |
| Pancreatic-related procedures   | - | - | 82, 84, 87, 89 |

**eTable 2. Diagnosis codes used in grouping causes of admission**

| Diagnoses/Procedures                     | DXCCS (CCS Codes for diagnoses)                                                                        |
|------------------------------------------|--------------------------------------------------------------------------------------------------------|
| <b><i>Inflammatory Bowel Disease</i></b> |                                                                                                        |
| Cardiac                                  | 96, 100, 101, 102, 104, 105, 106, 107, 108, 109, 112                                                   |
| Respiratory                              | 122, 124, 125, 127, 128, 129, 130, 131, 133, 134                                                       |
| Infections                               | 2, 4, 159, 197, 246                                                                                    |
| Genitourinary                            | 156, 157, 158, 160, 161, 163, 165, 166                                                                 |
| Gastrointestinal                         | 138, 140, 141, 143, 145, 146, 147, 151<br>152, 154, 155, 250, 251, 60, 144, 148, 149, 153, 135, 14, 15 |
| Endocrine/metabolic                      | 49, 50, 51, 52, 54, 55                                                                                 |
| Neuropsychiatric                         | 83, 84, 85, 93, 95, 653, 660, 661                                                                      |
| Hematological/neoplasms                  | 59, 32, 42, 44                                                                                         |
| Others                                   | 199, 204, 209, 211, 252, 253, 254, 257, 226,<br>229, 230, 231, 233, 235, 239, 242, 244                 |
| Inflammatory bowel disease specific      | 144, 148, 149, 153, 135, 14, 15                                                                        |

| <b><i>Chronic Liver Diseases</i></b>        |                                                                                                   |
|---------------------------------------------|---------------------------------------------------------------------------------------------------|
| Cardiac                                     | 96, 100, 101, 102, 104, 105, 106, 107, 108, 109, 112                                              |
| Respiratory                                 | 122, 124, 125, 127, 128, 129, 130, 131, 133, 134                                                  |
| Infections                                  | 2, 4, 159, 197, 246                                                                               |
| Genitourinary                               | 156, 157, 158, 160, 161, 163, 165, 166                                                            |
| Gastrointestinal                            | 138, 140, 141, 143, 145, 146, 147, 151<br>152, 154, 155, 250, 251, 60, 16, 150, 153, 157, 158, 85 |
| Endocrine/metabolic                         | 49, 50, 51, 52, 54, 55                                                                            |
| Neuropsychiatric                            | 83, 84, 85, 93, 95, 653, 660, 661                                                                 |
| Hematological/neoplasms                     | 59, 32, 42, 44                                                                                    |
| Others                                      | 199, 204, 209, 211, 252, 253, 254, 257, 226,<br>229, 230, 231, 233, 235, 239, 242, 244            |
| Chronic liver disease specific              | 16, 150, 153, 157, 158, 85                                                                        |
| <b><i>Functional/motility disorders</i></b> |                                                                                                   |
| Cardiac                                     | 96, 100, 101, 102, 104, 105, 106, 107, 108, 109, 112                                              |

|                                           |                                                                                                               |
|-------------------------------------------|---------------------------------------------------------------------------------------------------------------|
| Respiratory                               | 122, 124, 125, 127, 128, 129, 130, 131, 133, 134                                                              |
| Infections                                | 2, 4, 159, 197, 246                                                                                           |
| Genitourinary                             | 156, 157, 158, 160, 161, 163, 165, 166                                                                        |
| Gastrointestinal                          | 138, 140, 141, 143, 145, 146, 147, 151<br>152, 153, 154, 155, 250, 251, 60, 66, 67, 69, 70, 71, 72, 74,<br>75 |
| Endocrine/metabolic                       | 49, 50, 51, 52, 54, 55                                                                                        |
| Neuropsychiatric                          | 83, 84, 85, 93, 95, 653, 660, 661                                                                             |
| Hematological/neoplasms                   | 59, 32, 42, 44                                                                                                |
| Others                                    | 199, 204, 209, 211, 252, 253, 254, 257, 226,<br>229, 230, 231, 233, 235, 239, 242, 244                        |
| Functional/motility specific              | 66, 67, 69, 70, 71, 72, 74, 75                                                                                |
| <b><i>Gastrointestinal hemorrhage</i></b> |                                                                                                               |
| Cardiac                                   | 96, 100, 101, 102, 104, 105, 106, 107, 108, 109, 112                                                          |
| Respiratory                               | 122, 124, 125, 127, 128, 129, 130, 131, 133, 134                                                              |
| Infections                                | 2, 4, 159, 197, 246                                                                                           |

|                                      |                                                                                          |
|--------------------------------------|------------------------------------------------------------------------------------------|
| Genitourinary                        | 156, 157, 158, 160, 161, 163, 165, 166                                                   |
| Gastrointestinal                     | 138, 140, 141, 143, 145, 146, 147, 151<br>152, 154, 155, 250, 251, 60, 153               |
| Endocrine/metabolic                  | 49, 50, 51, 52, 54, 55                                                                   |
| Neuropsychiatric                     | 83, 84, 85, 93, 95, 653, 660, 661                                                        |
| Hematological/neoplasms              | 59, 32, 42, 44                                                                           |
| Others                               | 199, 204, 209, 211, 252, 253, 254, 257, 226,<br>229, 230, 231, 233, 235, 239, 242, 244   |
| Gastrointestinal hemorrhage specific | 153                                                                                      |
| <b><i>Pancreatic disorders</i></b>   |                                                                                          |
| Cardiac                              | 96, 100, 101, 102, 104, 105, 106, 107, 108, 109, 112                                     |
| Respiratory                          | 122, 124, 125, 127, 128, 129, 130, 131, 133, 134                                         |
| Infections                           | 2, 4, 159, 197, 246                                                                      |
| Genitourinary                        | 156, 157, 158, 160, 161, 163, 165, 166                                                   |
| Gastrointestinal                     | 138, 140, 141, 143, 145, 146, 147, 151<br>152, 153, 154, 155, 250, 251, 60, 17, 148, 149 |



|                              |                                                                                        |
|------------------------------|----------------------------------------------------------------------------------------|
| Endocrine/metabolic          | 49, 50, 51, 52, 54, 55                                                                 |
| Neuropsychiatric             | 83, 84, 85, 93, 95, 653, 660, 661                                                      |
| Hematological/neoplasms      | 59, 32, 42, 44                                                                         |
| Others                       | 199, 204, 209, 211, 252, 253, 254, 257, 226,<br>229, 230, 231, 233, 235, 239, 242, 244 |
| Pancreatic disorder specific | 17, 148, 149                                                                           |

**eTable 3. ICD-9-CM Coding For Agency for Agency for Healthcare Research and Quality (AHRQ) Preventive Quality Indicators (PQI)\***

| PQI Number | Preventive Quality Indicator                                    | Definition*                                                                                                                                                                                          | ICD-9 Codes                                                                                                                                                                                                                                                                                                                                                                                                                                                                                 |
|------------|-----------------------------------------------------------------|------------------------------------------------------------------------------------------------------------------------------------------------------------------------------------------------------|---------------------------------------------------------------------------------------------------------------------------------------------------------------------------------------------------------------------------------------------------------------------------------------------------------------------------------------------------------------------------------------------------------------------------------------------------------------------------------------------|
| 1          | Diabetes short term complications                               | Discharges with a principal ICD-9-CM diagnosis for diabetes short-term complications (ketoacidosis, hyperosmolarity, or coma)                                                                        | 250.10, 250.11, 250.12, 250.13, 250.20, 250.21, 250.22, 250.23, 250.30, 250.31, 250.32, 250.33                                                                                                                                                                                                                                                                                                                                                                                              |
| 2          | Perforated appendix                                             | Discharges with any listed-listed ICD-9-CM diagnosis codes for perforations or abscesses of appendix                                                                                                 | 540.0, 540.1, 540.9, 541                                                                                                                                                                                                                                                                                                                                                                                                                                                                    |
| 3          | Diabetes long term complications                                | Discharges with a principal ICD-9-CM diagnosis code for diabetes with long-term complications (renal, eye, neurological, circulatory, or complications not otherwise specified)                      | 250.40, 250.41, 250.42, 250.43, 250.50, 250.51, 250.52, 250.53, 250.60, 250.61, 250.62, 250.63, 250.70, 250.71, 250.72, 250.73, 250.80, 250.81, 250.82, 250.83, 250.90, 250.91, 250.92, 250.93                                                                                                                                                                                                                                                                                              |
| 5          | Chronic obstructive pulmonary disease or Asthma in Older Adults | <p>Discharges with a principal ICD-9-CM diagnosis code for COPD or asthma</p> <p><u>Excluded cases</u><br/>Any listed ICD-9-CM codes for cystic fibrosis and anomalies of the respiratory system</p> | <p><u>COPD (excluding acute bronchitis)</u><br/>491.0, 491.1, 491.20, 491.21, 491.22, 491.8, 491.9, 492.0, 492.8, 494, 494.0, 494.1, 496</p> <p><u>Asthma</u><br/>493.00, 493.01, 493.02, 493.10, 493.11, 493.12, 493.20, 493.21, 493.22, 493.81, 493.82, 493.90, 493.91, 493.92</p> <p><u>Excluded cases</u><br/>277.0, 277.01, 277.02, 277.03, 277.09, 516.61, 516.62, 516.63, 516.64, 516.69, 747.21, 748.3, 748.4, 748.5, 748.60, 748.61, 748.69, 748.8, 748.9, 750.3, 759.3, 770.7</p> |
| 7          | Hypertension                                                    | <p>Discharges with a principal ICD-9-CM diagnosis code for hypertension</p> <p><u>Excluded cases</u><br/>With any listed ICD-9-CM procedure codes for cardiac procedure or any listed ICD-9-</p>     | <p>401.0, 401.9, 402.00, 402.10, 402.90, 403.00, 403.10, 403.90, 404.00, 404.10, 404.90</p> <p><u>Excluded cases</u><br/>403.00, 403.10, 404.00, 404.10, 404.90</p>                                                                                                                                                                                                                                                                                                                         |

|    |                          |                                                                                                                                                               |                                                                                                                                                                                                                                                                                                                                                                                                                                                                                                                                                                                                                                                                                                                                                                                                                                                                                                                                                                                                                                                                                                                                                              |
|----|--------------------------|---------------------------------------------------------------------------------------------------------------------------------------------------------------|--------------------------------------------------------------------------------------------------------------------------------------------------------------------------------------------------------------------------------------------------------------------------------------------------------------------------------------------------------------------------------------------------------------------------------------------------------------------------------------------------------------------------------------------------------------------------------------------------------------------------------------------------------------------------------------------------------------------------------------------------------------------------------------------------------------------------------------------------------------------------------------------------------------------------------------------------------------------------------------------------------------------------------------------------------------------------------------------------------------------------------------------------------------|
|    |                          | CM diagnosis codes for Stage I-IV kidney disease, only if accompanied by any listed ICD-9-CM procedure codes for dialysis access                              | <p style="text-align: center;"><i>Procedure codes</i></p> 00.50, 00.51, 00.52, 00.53, 00.54, 00.56, 00.57, 00.66, 17.51, 17.52, 17.55, 35.00, 35.01, 35.02, 35.03, 35.04, 35.05, 35.06, 35.07, 35.08, 35.09, 35.10, 35.11, 35.12, 35.13, 35.14, 35.20, 35.22, 35.23, 35.24, 35.25, 35.26, 35.27, 35.28, 35.31, 35.32, 35.33, 35.34, 35.35, 35.39, 35.41, 35.42, 35.35, 35.39, 35.41, 35.42, 35.50, 35.51, 35.52, 35.53, 35.54, 35.55, 35.60, 35.61, 35.62, 35.63, 35.70, 35.71, 35.72, 35.73, 35.81, 35.82, 35.83, 35.84, 35.91, 35.92, 35.93, 35.94, 35.95, 35.96, 35.97, 35.98, 35.99, 36.01, 36.02, 36.03, 36.04, 36.05, 36.06, 36.07, 36.09, 36.10, 36.11, 36.12, 36.13, 36.14, 36.15, 36.16, 36.17, 36.19, 36.2, 36.3, 36.31, 36.32, 36.33, 36.34, 36.39, 36.91, 36.99, 37.31, 37.32, 37.33, 37.34, 37.35, 37.36, 37.37, 37.41, 37.5, 37.51, 37.52, 37.53, 37.54, 37.55, 37.60, 37.61, 37.62, 37.63, 37.64, 37.65, 37.66, 37.70, 37.71, 37.72, 37.73, 37.74, 37.75, 37.76, 37.77, 37.78, 37.79, 37.80, 37.81, 37.82, 37.83, 37.85, 37.86, 37.87, 37.89, 37.94, 37.95, 37.96, 37.97, 37.98, 38.26<br><br>38.95, 39.27, 39.29, 39.42, 39.43, 39.93, 39.94 |
| 8  | Congestive heart failure | Discharges with a principal ICD-9-CM diagnosis code for heart failure                                                                                         | 398.91, 402.01, 402.11, 402.91, 404.01, 404.03, 404.11, 404.13, 404.91, 404.93, 428.0, 428.1, 428.20, 428.21, 428.22, 428.23, 428.30, 428.31, 428.32, 428.33, 428.40, 428.41, 428.42, 428.43, 428.9                                                                                                                                                                                                                                                                                                                                                                                                                                                                                                                                                                                                                                                                                                                                                                                                                                                                                                                                                          |
| 10 | Dehydration              | Discharges with either a principal ICD-9-CM diagnosis code for dehydration or any secondary ICD-9-CM diagnosis codes for dehydration and a principal ICD-9-CM | 276.5, 276.50, 276.51, 276.52, 276.0, 008.61, 008.62, 008.63, 008.64, 008.65, 008.66, 008.67, 008.69, 008.8, 009.0, 009.1, 009.2, 009.3, 558.9, 584.5, 584.6, 584.7, 584.8,                                                                                                                                                                                                                                                                                                                                                                                                                                                                                                                                                                                                                                                                                                                                                                                                                                                                                                                                                                                  |

|    |                     |                                                                                                                                                                                                                                                                                                        |                                                                                                                                                                                                                                                                                                                                                                                                                                                                                                                                                                                                                                                                                                                                                                                                                                                                                                                                                                                                                                                                                  |
|----|---------------------|--------------------------------------------------------------------------------------------------------------------------------------------------------------------------------------------------------------------------------------------------------------------------------------------------------|----------------------------------------------------------------------------------------------------------------------------------------------------------------------------------------------------------------------------------------------------------------------------------------------------------------------------------------------------------------------------------------------------------------------------------------------------------------------------------------------------------------------------------------------------------------------------------------------------------------------------------------------------------------------------------------------------------------------------------------------------------------------------------------------------------------------------------------------------------------------------------------------------------------------------------------------------------------------------------------------------------------------------------------------------------------------------------|
|    |                     | <p>diagnosis code for hyperosmolality and/or hypernatremia, gastroenteritis, or acute kidney injury</p> <p><u>Excluded cases</u><br/>Any listed ICD-9-CM diagnosis codes for chronic renal failure</p>                                                                                                 | <p>584.9, 586, 997.5</p> <p><u>Exclude cases</u><br/>403.01, 403.11, 403.91, 404.02, 404.03, 404.12, 404.13, 404.92, 404.93, 585.5, 585.6</p>                                                                                                                                                                                                                                                                                                                                                                                                                                                                                                                                                                                                                                                                                                                                                                                                                                                                                                                                    |
| 11 | Bacterial pneumonia | <p>Discharges with a principal ICD-9-CM diagnosis code for bacterial pneumonia</p> <p><u>Excluded cases</u><br/>Any listed ICD-9-CM diagnosis codes for sickle cell anemia or HB-S disease. Any listed ICD-9-CM diagnosis codes or any listed ICD-9-CM procedure codes for immunocompromised state</p> | <p>481, 4822, 48230, 48231, 48232, 48239, 48240, 48241, 48242, 48249, 4829, 4830, 4831, 4838, 485, 486</p> <p><u>Excluded cases</u><br/>42, 136.3, 199.2, 238.73, 238.76, 238.77, 238.79, 260, 261, 262, 279.00, 279.01, 279.02, 279.03, 279.04, 279.05, 279.06, 279.09, 279.10, 279.11, 279.12, 279.13, 279.19, 279.2, 279.3, 279.4, 27941, 279.50, 279.51, 27952, 279.53, 279.8, 279.9, 284.09, 284.1, 284.11, 284.1, 284.19, 288.0, 288.00, 288.01, 288.02, 288.03, 288.09, 288.1, 288.2, 288.4, 288.50, 288.51, 288.59, 289.53, 289.83, 403.01, 403.11, 439.1, 404.02, 404.03, 404.12, 404.13, 404.92, 404.93, 579.3, 585, 585.5, 585.6, 996.8, 996.80, 996.81, 996.82, 996.83, 996.84, 996.85, 996.86, 996.87, 996.88, 996.89, V420, V421, V426, V427, V428, V4281, V428.2, V428.3, V4284, V4289, V451, V451.1, V560, V561, V562</p> <p><u>Procedure codes</u><br/>00.18, 33.5, 33.50, 33.51, 33.52, 33.6, 37.5, 37.51, 41.0, 41.00, 41.01, 41.02, 41.03, 41.04, 41.05, 41.06, 41.07, 41.08, 41.09, 4697, 50.51, 50.59, 52.80, 52.81, 52.82, 52.83, 52.85, 52.86, 55.69</p> |

|    |                                            |                                                                                                                                                                                                                                                                                                         |                                                                                                                                                                                                                                                                                                                                                                          |
|----|--------------------------------------------|---------------------------------------------------------------------------------------------------------------------------------------------------------------------------------------------------------------------------------------------------------------------------------------------------------|--------------------------------------------------------------------------------------------------------------------------------------------------------------------------------------------------------------------------------------------------------------------------------------------------------------------------------------------------------------------------|
| 12 | Urinary tract infection                    | Discharges with a principal ICD-9-CM diagnosis code for urinary tract infection<br><br><u>Excluded cases</u><br>With any listed ICD-9-CM diagnosis codes for kidney/urinary tract disorder. With any listed ICD-9-CM diagnosis codes or any listed ICD-9-CM procedure codes for immunocompromised state | 590.10, 590.11, 590.2, 590.3, 590.80, 590.81, 590.9, 595.0, 595.9, 599.0<br><br><u>Excluded cases</u><br>590.00, 590.01, 593.70, 593.71, 593.72, 593.73, 753.0, 753.10, 753.11, 753.12, 753.13, 753.14, 753.15, 753.16, 753.17, 753.19, 753.20, 753.21, 753.22, 753.23, 753.29, 753.3, 753.4, 753.5, 753.6, 753.8, 753.9                                                 |
| 13 | Angina without procedure                   | Discharges with a principal diagnosis code for angina<br><br><u>Excluded cases</u><br>With any listed ICD-9-CM procedure codes for cardiac procedure                                                                                                                                                    | 411.81, 411.89, 413.0, 413.1, 413.9                                                                                                                                                                                                                                                                                                                                      |
| 14 | Uncontrolled diabetes                      | Discharges with a principal diagnosis code for uncontrolled diabetes without mention of a short-term or long-term complication                                                                                                                                                                          | 250.02, 250.03                                                                                                                                                                                                                                                                                                                                                           |
| 15 | Asthma in younger adults                   | Discharges with a principal ICD-9-CM diagnosis code for asthma<br><br><u>Excluded cases</u><br>With any listed ICD-9 diagnosis codes for cystic fibrosis and anomalies of the respiratory system                                                                                                        | 493.00, 493.01, 493.02, 493.10, 493.11, 493.12, 493.20, 493.21, 493.22, 493.81, 493.82, 493.90, 493.91, 493.92                                                                                                                                                                                                                                                           |
| 16 | Lower-extremity amputation among diabetics | Any listed ICD-9-CM procedure codes for lower-extremity amputation and any-listed ICD-9-CM diagnosis codes for diabetes<br><br><u>Excluded cases</u><br>89.50, 89.51, 89.60, 89.61, 89.62, 89.63, 89.70, 89.71, 89.72, 89.73, 89.72, 89.73, 89.74, 89.75, 89.76, 89.77                                  | <i>Procedure codes</i><br>84.10, 84.12, 84.13, 84.14, 84.15, 84.16, 84.17, 84.18, 84.19<br><br><i>Diagnosis codes</i><br>250.00, 250.01, 250.02, 250.03, 250.10, 250.11, 250.12, 250.13, 250.20, 250.21, 250.22, 250.23, 250.30, 250.31, 250.32, 250.33, 250.40, 250.41, 250.42, 250.43, 250.50, 250.51, 250.52, 250.53, 250.60, 250.61, 250.62, 250.63, 250.70, 250.71, |

|  |  |  |                                                                                   |
|--|--|--|-----------------------------------------------------------------------------------|
|  |  |  | 250.72, 250.73, 250.80, 250.81, 250.82,<br>250.83, 250.90, 250.91, 250.92, 250.93 |
|--|--|--|-----------------------------------------------------------------------------------|

\*ICD9 codes for Prevention Quality Indicators (PQIs), which are a set of measures that can be used with hospital inpatient discharge data to identify quality of care for ambulatory conditions for which good outpatient care can potentially prevent hospitalization, complications, or more severe disease. PQIs were developed by the Agency for Healthcare Research and Quality (AHRQ).

**eTable 4.** Unique, non-overlapping patients with different gastrointestinal diseases, within our NRD cohort

| <b>Index diagnosis</b>        | <b>Total number of index hospitalizations without accounting for overlap</b> | <b>Proportion of patients without overlapping diagnoses</b> | <b>Percentage of unique index hospitalization</b> |
|-------------------------------|------------------------------------------------------------------------------|-------------------------------------------------------------|---------------------------------------------------|
| Inflammatory Bowel Disease    | 44,104                                                                       | 36,733                                                      | 83.3%                                             |
| Chronic Liver Diseases        | 354,918                                                                      | 281,607                                                     | 79.3%                                             |
| Functional/motility disorders | 345,519                                                                      | 293,969                                                     | 85.1%                                             |
| Gastrointestinal hemorrhage   | 180,013                                                                      | 136,475                                                     | 75.8%                                             |
| Pancreatic disease            | 96,136                                                                       | 63,437                                                      | 65.9%                                             |

**eTable 5. Burden of hospitalizations due to chronic gastrointestinal and liver diseases, by deciles and standardized by per month of follow-up**

| Deciles                                 | Inflammatory bowel disease                               | Chronic liver diseases                                   | Functional/motility disorders                            | Gastrointestinal hemorrhage                              | Pancreatic disease                                       |
|-----------------------------------------|----------------------------------------------------------|----------------------------------------------------------|----------------------------------------------------------|----------------------------------------------------------|----------------------------------------------------------|
|                                         | Median<br>IQR<br>5 <sup>th</sup> -95 <sup>th</sup> range |
| <b>Total days spent in the hospital</b> |                                                          |                                                          |                                                          |                                                          |                                                          |
| 1 <sup>st</sup>                         | 0.13<br>0.10-0.17<br>0.08-0.18                           | 0.13<br>0.10-0.17<br>0.08-0.18                           | 0.14<br>0.10-0.18<br>0.08-0.20                           | 0.13<br>0.10-0.17<br>0.08-0.18                           | 0.14<br>0.10-0.18<br>0.08-0.20                           |
| 2 <sup>nd</sup>                         | 0.25<br>0.22-0.25<br>0.20-0.25                           | 0.25<br>0.22-0.27<br>0.20-0.29                           | 0.27<br>0.25-0.29<br>0.22-0.30                           | 0.25<br>0.22-0.25<br>0.20-0.27                           | 0.25<br>0.25-0.27<br>0.22-0.29                           |
| 3 <sup>rd</sup>                         | 0.30<br>0.29-0.33<br>0.27-0.36                           | 0.33<br>0.33-0.38<br>0.30-0.40                           | 0.38<br>0.33-0.42<br>0.33-0.43                           | 0.33<br>0.30-0.36<br>0.29-0.38                           | 0.33<br>0.33-0.36<br>0.30-0.38                           |
| 4 <sup>th</sup>                         | 0.42<br>0.40-0.43<br>0.38-0.44                           | 0.45<br>0.43-0.50<br>0.42-0.50                           | 0.50<br>0.45-0.55<br>0.44-0.56                           | 0.44<br>0.42-0.50<br>0.40-0.50                           | 0.44<br>0.42-0.50<br>0.40-0.50                           |
| 5 <sup>th</sup>                         | 0.55<br>0.50-0.57<br>0.45-0.60                           | 0.60<br>0.57-0.67<br>0.55-0.70                           | 0.64<br>0.58-0.67<br>0.57-0.71                           | 0.60<br>0.57-0.64<br>0.55-0.67                           | 0.57<br>0.56-0.60<br>0.55-0.63                           |
| 6 <sup>th</sup>                         | 0.71<br>0.67-0.75<br>0.63-0.80                           | 0.82<br>0.75-0.88<br>0.71-0.92                           | 0.83<br>0.75-0.89<br>0.73-0.92                           | 0.78<br>0.73-0.86<br>0.70-0.90                           | 0.73<br>0.67-0.78<br>0.64-0.83                           |
| 7 <sup>th</sup>                         | 0.92<br>0.88-1.00<br>0.82-1.08                           | 1.10<br>1.00-1.18<br>1.00-1.25                           | 1.10<br>1.00-1.18<br>1.00-1.25                           | 1.09<br>1.00-1.17<br>0.91-1.25                           | 1.00<br>0.89-1.00<br>0.86-1.13                           |
| 8 <sup>th</sup>                         | 1.29<br>1.18-1.43<br>1.11-1.56                           | 1.50<br>1.40-1.67<br>1.29-1.78                           | 1.50<br>1.38-1.64<br>1.29-1.75                           | 1.50<br>1.38-1.63<br>1.29-1.75                           | 1.33<br>1.25-1.50<br>1.14-1.60                           |
| 9 <sup>th</sup>                         | 2.00<br>1.75-2.20<br>1.60-2.45                           | 2.25<br>2.00-2.55<br>1.86-2.82                           | 2.22<br>2.00-2.50<br>1.86-2.78                           | 2.20<br>2.00-2.50<br>1.83-2.78                           | 2.20<br>1.82-2.30<br>1.67-2.60                           |
| 10 <sup>th</sup>                        | 3.71<br>3.00-5.08<br>2.63-9.10                           | 4.14<br>3.42-5.63<br>3.00-9.89                           | 4.13<br>3.36-5.63<br>3.00-9.86                           | 4.12<br>3.36-5.58<br>2.92-9.82                           | 3.90<br>3.18-5.40<br>2.75-9.56                           |



| <b>Total number of hospital admissions</b>                        |                                |                                |                                |                                |                                |
|-------------------------------------------------------------------|--------------------------------|--------------------------------|--------------------------------|--------------------------------|--------------------------------|
| 1 <sup>st</sup>                                                   | 0.09<br>0.08-0.11<br>0.08-0.14 | 0.09<br>0.08-0.11<br>0.08-0.14 | 0.10<br>0.09-0.11<br>0.08-0.14 | 0.09<br>0.08-0.11<br>0.08-0.14 | 0.10<br>0.09-0.11<br>0.08-0.14 |
| 2 <sup>nd</sup>                                                   | 0.11<br>0.10-0.13<br>0.08-0.13 | 0.11<br>0.09-0.13<br>0.08-0.17 | 0.11<br>0.09-0.13<br>0.08-0.17 | 0.10<br>0.09-0.13<br>0.08-0.13 | 0.11<br>0.09-0.13<br>0.08-0.17 |
| 3 <sup>rd</sup>                                                   | 0.10<br>0.09-0.14<br>0.08-0.18 | 0.10<br>0.10-0.13<br>0.08-0.20 | 0.11<br>0.09-0.14<br>0.08-0.20 | 0.11<br>0.10-0.14<br>0.08-0.20 | 0.11<br>0.09-0.13<br>0.08-0.20 |
| 4 <sup>th</sup>                                                   | 0.13<br>0.10-0.20<br>0.08-0.22 | 0.13<br>0.09-0.14<br>0.08-0.25 | 0.11<br>0.10-0.17<br>0.08-0.25 | 0.11<br>0.10-0.14<br>0.08-0.25 | 0.11<br>0.10-0.14<br>0.08-0.25 |
| 5 <sup>th</sup>                                                   | 0.13<br>0.10-0.18<br>0.08-0.25 | 0.13<br>0.10-0.18<br>0.08-0.29 | 0.14<br>0.10-0.18<br>0.08-0.29 | 0.14<br>0.10-0.18<br>0.08-0.29 | 0.13<br>0.11-0.18<br>0.08-0.29 |
| 6 <sup>th</sup>                                                   | 0.14<br>0.11-0.22<br>0.08-0.30 | 0.14<br>0.11-0.22<br>0.08-0.33 | 0.14<br>0.11-0.22<br>0.08-0.33 | 0.14<br>0.11-0.22<br>0.09-0.33 | 0.14<br>0.10-0.20<br>0.08-0.30 |
| 7 <sup>th</sup>                                                   | 0.18<br>0.13-0.25<br>0.08-0.36 | 0.18<br>0.13-0.27<br>0.08-0.42 | 0.18<br>0.13-0.25<br>0.09-0.38 | 0.18<br>0.13-0.27<br>0.08-0.40 | 0.18<br>0.13-0.25<br>0.09-0.38 |
| 8 <sup>th</sup>                                                   | 0.22<br>0.14-0.30<br>0.09-0.44 | 0.25<br>0.14-0.33<br>0.09-0.50 | 0.25<br>0.14-0.33<br>0.09-0.50 | 0.25<br>0.14-0.33<br>0.09-0.50 | 0.25<br>0.14-0.33<br>0.09-0.50 |
| 9 <sup>th</sup>                                                   | 0.29<br>0.18-0.40<br>0.10-0.58 | 0.29<br>0.17-0.43<br>0.09-0.67 | 0.29<br>0.18-0.42<br>0.10-0.63 | 0.29<br>0.17-0.42<br>0.09-0.63 | 0.29<br>0.18-0.43<br>0.09-0.67 |
| 10 <sup>th</sup>                                                  | 0.42<br>0.27-0.58<br>0.11-1.00 | 0.40<br>0.25-0.60<br>0.10-1.00 | 0.43<br>0.27-0.63<br>0.11-1.00 | 0.40<br>0.25-0.57<br>0.10-1.00 | 0.43<br>0.25-0.64<br>0.11-1.08 |
| <b>Total charges across all hospitalizations<br/>(in dollars)</b> |                                |                                |                                |                                |                                |
| 1 <sup>st</sup>                                                   | 427<br>291-662<br>153-1529     | 480<br>308-788<br>166-1713     | 452<br>298-735<br>161-1639     | 414<br>291-600<br>165-1166     | 422<br>294-627<br>171-1190     |
| 2 <sup>nd</sup>                                                   | 538<br>384-807<br>229-1791     | 643<br>437-1002<br>253-2079    | 645<br>437-1050<br>259-2218    | 560<br>415-778<br>265-1378     | 603<br>433-878<br>277-1548     |

|                  |                                  |                                  |                                  |                                  |                                  |
|------------------|----------------------------------|----------------------------------|----------------------------------|----------------------------------|----------------------------------|
| 3 <sup>rd</sup>  | 672<br>478-1008<br>286-2202      | 796<br>552-1198<br>321-2379      | 827<br>564-1321<br>339-2741      | 736<br>546-1018<br>353-1793      | 737<br>528-1041<br>340-1785      |
| 4 <sup>th</sup>  | 847<br>603-1238<br>373-2507      | 1014<br>711-1482<br>415-2875     | 1014<br>708-1515<br>428-3138     | 959<br>708-1330<br>465-2360      | 951<br>695-1331<br>444-2264      |
| 5 <sup>th</sup>  | 1053<br>758-1497<br>471-2926     | 1295<br>912-1877<br>537-3522     | 1273<br>891-1884<br>536-3780     | 1261<br>931-1743<br>603-3035     | 1190<br>871-1633<br>569-2733     |
| 6 <sup>th</sup>  | 1399<br>1016-1976<br>640-3597    | 1701<br>1214-2441<br>728-4470    | 1602<br>1144-2292<br>698-4298    | 1660<br>1226-2304<br>811-3987    | 1458<br>1086-1990<br>710-3383    |
| 7 <sup>th</sup>  | 1855<br>1359-2557<br>860-4486    | 2270<br>1633-3215<br>991-5744    | 2081<br>1496-2946<br>924-5308    | 2222<br>1651-3059<br>1096-5186   | 1926<br>1436-2618<br>956-4397    |
| 8 <sup>th</sup>  | 2537<br>1868-3433<br>1202-5681   | 3118<br>2263-4390<br>1382-7614   | 2796<br>2043-3889<br>1248-6687   | 3088<br>2296-4226<br>1519-7047   | 2650<br>1997-3586<br>1307-6085   |
| 9 <sup>th</sup>  | 3788<br>2816-5040<br>1832-8167   | 4612<br>3343-6488<br>2010-11113  | 4071<br>2980-5631<br>1793-9504   | 4542<br>3394-6206<br>2255-10261  | 4006<br>3011-5427<br>1994-8956   |
| 10 <sup>th</sup> | 7502<br>5270-11348<br>3391-22805 | 8925<br>6045-13858<br>3475-28473 | 7794<br>5353-11742<br>3082-22946 | 8983<br>6269-13560<br>3969-27575 | 8221<br>5722-12579<br>3546-26461 |

**eTable 6. Inflammatory Bowel Disease - baseline patient, hospital, and hospitalization characteristics at index and Subsequent admissions stratified by deciles and presented as 1<sup>th</sup>, 5<sup>th</sup>, and 10<sup>th</sup> deciles.**

| Characteristics                                              | 1 <sup>th</sup> decile | 5 <sup>th</sup> decile | 10 <sup>th</sup> decile | p-value |
|--------------------------------------------------------------|------------------------|------------------------|-------------------------|---------|
| <b>Hospital Characteristics</b>                              |                        |                        |                         |         |
| Teaching status                                              |                        |                        |                         |         |
| 1. Metropolitan non-teaching                                 | 2320 (42%)             | 2061 (41%)             | 1793 (38%)              | <0.0001 |
| 2. Metropolitan teaching                                     | 2657 (49%)             | 2511 (50%)             | 2671 (57%)              |         |
| 3. Non-metropolitan                                          | 495 (9%)               | 464 (9%)               | 253 (5%)                |         |
| Location                                                     |                        |                        |                         |         |
| 1. Metropolitan                                              | 4977 (91%)             | 4572 (91%)             | 4464 (95%)              | <0.0001 |
| 2. Non-metropolitan                                          | 495 (9%)               | 464 (9%)               | 253 (5%)                |         |
| Bed-size                                                     |                        |                        |                         |         |
| 1. Small                                                     | 678 (12%)              | 520 (10%)              | 353 (7%)                | <0.0001 |
| 2. Medium                                                    | 1347 (25%)             | 1176 (23%)             | 1026 (22%)              |         |
| 3. Large                                                     | 3447 (63%)             | 3340 (66%)             | 3338 (71%)              |         |
| <b>Patient Characteristics</b>                               |                        |                        |                         |         |
| Mean age                                                     | 51.0 ± 18.7            | 53.5 ± 19.4            | 54.9 ± 18.7             | <0.0001 |
| Length of stay (unadjusted by month of follow-up)            |                        |                        |                         | <0.0001 |
| • Median                                                     | 1                      | 5                      | 9                       |         |
| • IQR                                                        | 1-2                    | 3-5                    | 4-19                    |         |
| • 5 <sup>th</sup> – 95 <sup>th</sup> range                   | 1-2                    | 1-6                    | 2-43                    |         |
| Female sex                                                   | 3019 (55%)             | 2968 (59%)             | 2634 (56%)              | <0.0001 |
| Primary expected payer                                       |                        |                        |                         |         |
| 1. Medicare/Medicaid                                         | 2305 (42%)             | 2542 (51%)             | 3090 (66%)              | <0.0001 |
| 2. Private insurance                                         | 2575 (47%)             | 1985 (39%)             | 1263 (27%)              |         |
| 3. Self-pay                                                  | 325 (6%)               | 248 (5%)               | 170 (4%)                |         |
| 4. No charge/others                                          | 264 (5%)               | 253 (5%)               | 191 (4%)                |         |
| Median household income                                      |                        |                        |                         |         |
| 1. 0-25 <sup>th</sup> percentile (\$1 - \$37,99)             | 1095 (20%)             | 1123 (23%)             | 1207 (26%)              | <0.0001 |
| 2. 26 <sup>th</sup> to 50 <sup>th</sup> percentile (\$38,000 | 1316 (24%)             | 1246 (25%)             | 1188 (26%)              |         |

|                                                                          |            |            |            |         |
|--------------------------------------------------------------------------|------------|------------|------------|---------|
| - \$47,999)                                                              |            |            |            |         |
| 3. 51 <sup>st</sup> to 75 <sup>th</sup> percentile (\$48,000 - \$63,999) | 1449 (27%) | 1298 (26%) | 1100 (24%) |         |
| 4. 76 <sup>th</sup> to 100 <sup>th</sup> percentile (\$64,000 or more)   | 1537 (28%) | 1311 (26%) | 1150 (25%) |         |
| <b>Index Hospitalization Comorbidities</b>                               |            |            |            |         |
| Smoking                                                                  | 1464 (27%) | 1405 (28%) | 1209 (26%) | 0.04    |
| Obesity                                                                  | 351 (6%)   | 438 (9%)   | 501 (11%)  | <0.0001 |
| Anemia                                                                   | 653 (12%)  | 1102 (22%) | 1534 (33%) | <0.0001 |
| Congestive heart failure                                                 | 111 (2%)   | 202 (4%)   | 480 (10%)  | <0.0001 |
| Chronic lung disease                                                     | 696 (13%)  | 770 (15%)  | 990 (21%)  | <0.0001 |
| Depression (combine uncomplicated and complicated)                       | 623 (11%)  | 695 (14%)  | 733 (16%)  | <0.0001 |
| Diabetes (combine uncomplicated and complicated)                         | 621 (11%)  | 596 (12%)  | 758 (16%)  | <0.0001 |
| Hypertension (combine uncomplicated and complicated)                     | 1904 (35%) | 1951 (39%) | 1936 (41%) | <0.0001 |
| Coagulation disorder                                                     | 120 (2%)   | 205 (4%)   | 435 (9%)   | <0.0001 |
| Liver disorder                                                           | 145 (3%)   | 194 (4%)   | 298 (6%)   | <0.0001 |
| Electrolyte abnormalities                                                | 1175 (21%) | 1683 (33%) | 2226 (47%) | <0.0001 |
| Peripheral vascular disease                                              | 121 (2%)   | 179 (4%)   | 273 (6%)   | <0.0001 |
| Psychoses                                                                | 158 (3%)   | 233 (5%)   | 352 (7%)   | <0.0001 |
| Renal failure                                                            | 259 (5%)   | 350 (7%)   | 716 (15%)  | <0.0001 |
| <b>Index Hospitalization Characteristics</b>                             |            |            |            |         |
| Gastrointestinal or hepatic procedures                                   | 948 (17%)  | 1746 (35%) | 2074 (44%) | <0.0001 |

|                                                                         |            |            |            |         |
|-------------------------------------------------------------------------|------------|------------|------------|---------|
| Blood transfusions                                                      | 249 (5%)   | 484 (10%)  | 1074 (23%) | <0.0001 |
| Parenteral or enteral nutrition                                         | 7 (0.1%)   | 45 (0.9%)  | 637 (14%)  | <0.0001 |
| Inflammatory bowel related procedures                                   | 772 (14%)  | 1581 (31%) | 1913 (41%) | <0.0001 |
| Unadjusted mortality                                                    | 156 (3%)   | 72 (1%)    | 112 (2%)   | <0.0001 |
| <b>Hospitalization Characteristics Across All Subsequent Admissions</b> |            |            |            |         |
| Gastrointestinal or hepatic procedures                                  |            |            |            |         |
| 1. 0                                                                    | 4520 (83%) | 3019 (60%) | 1264 (27%) | <0.0001 |
| 2. 1                                                                    | 949 (17%)  | 1889 (38%) | 1653 (35%) |         |
| 3. 2                                                                    | 3 (0.1%)   | 126 (3%)   | 1037 (22%) |         |
| 4. 3 or more                                                            | 0 (0%)     | 2 (0.04%)  | 763 (16%)  |         |
| Blood transfusions                                                      |            |            |            |         |
| 1. 0                                                                    | 5221 (95%) | 4481 (89%) | 2547 (54%) | <0.0001 |
| 2. 1                                                                    | 250 (5%)   | 510 (10%)  | 1287 (27%) |         |
| 3. 2                                                                    | 1 (0.02%)  | 42 (0.8%)  | 530 (11%)  |         |
| 4. 3 or more                                                            | 0 (0%)     | 3 (0.1%)   | 353 (7%)   |         |
| Parenteral or enteral nutrition                                         |            |            |            |         |
| 1. 0                                                                    | 5465 (99%) | 4987 (9%)  | 3381 (72%) | <0.0001 |
| 2. 1                                                                    | 7 (0.1%)   | 49 (1%)    | 926 (20%)  |         |
| 3. 2                                                                    | 0 (0%)     | 0 (0%)     | 243 (5%)   |         |
| 4. 3 or more                                                            | 0 (0%)     | 0 (0%)     | 167 (3%)   |         |
| Inflammatory bowel related procedures                                   |            |            |            |         |
| 1. 0                                                                    | 4696 (86%) | 3209 (64%) | 1418 (30%) | <0.0001 |
| 2. 1                                                                    | 773 (14%)  | 1738 (35%) | 1754 (37%) |         |
| 3. 2                                                                    | 3 (0%)     | 88 (2%)    | 990 (21%)  |         |
| 4. 3 or more                                                            | 0 (0%)     | 1 (0%)     | 555 (12%)  |         |
| Unadjusted mortality                                                    | 156 (3%)   | 99 (2%)    | 459 (10%)  | <0.0001 |

**eTable 7.** Risk factors for high utilization of healthcare resources in patients with inflammatory bowel diseases.

| <b>Variable at Index Hospitalization</b>                                  | <b>Odds Ratio (95% Confidence Interval)</b> | <b>p-value</b> |
|---------------------------------------------------------------------------|---------------------------------------------|----------------|
| Age                                                                       | 0.99 (0.98 – 0.99)                          | <0.01          |
| Female                                                                    | 0.94 (0.88 – 1.00)                          | 0.05           |
| IBD-related surgery at index hospitalization                              | 0.89 (0.73 – 1.10)                          | 0.30           |
| Payer (reference is medicare/medicaid)                                    |                                             |                |
| Private insurance                                                         | 0.53 (0.49 – 0.58)                          | <0.01          |
| Self-pay                                                                  | 0.57 (0.49 – 0.68)                          | <0.01          |
| Other                                                                     | 0.70 (0.59 – 0.82)                          | <0.01          |
| Urban versus rural location                                               | 0.59 (0.51 – 0.68)                          | <0.01          |
| Median household income quartiles (reference is 1 <sup>st</sup> quartile) |                                             |                |
| 2 <sup>nd</sup> quartile                                                  | 0.90 (0.83 – 0.99)                          | 0.02           |
| 3 <sup>rd</sup> quartile                                                  | 0.82 (0.75 – 0.90)                          | <0.01          |
| 4 <sup>th</sup> quartile                                                  | 0.87 (0.79 – 0.95)                          | <0.01          |
| Hospital bed size (reference is small)                                    |                                             |                |
| Medium                                                                    | 1.25 (1.10 – 1.43)                          | <0.01          |
| Large                                                                     | 1.49 (1.32 – 1.67)                          | <0.01          |
| Charlson Comorbidity Index (reference is 0)                               |                                             |                |
| 1                                                                         | 1.39 (1.27 – 1.51)                          | <0.01          |
| 2 or more                                                                 | 2.63 (2.42 – 2.85)                          | <0.01          |
| Smoking                                                                   | 0.89 (0.83 – 0.95)                          | <0.01          |
| Depression                                                                | 1.12 (1.03 – 1.22)                          | 0.01           |
| Obesity                                                                   | 1.17 (1.05 – 1.30)                          | <0.01          |
| IBD-related admission (reference)                                         |                                             |                |
| Cardiac-related                                                           | 0.62 (0.54 – 0.71)                          | <0.01          |

|                          |                    |       |
|--------------------------|--------------------|-------|
| Respiratory related      | 0.79 (0.68 – 0.92) | <0.01 |
| Infection-related        | 1.43 (1.28 – 1.60) | <0.01 |
| Genitourinary-related    | 0.78 (0.64 – 0.94) | 0.01  |
| Gastrointestinal-related | 0.89 (0.81 – 0.99) | 0.03  |
| Neuropsychiatric-related | 0.77 (0.61 – 0.98) | 0.03  |
| Other causes             | 0.82 (0.75 – 0.89) | <0.01 |

\*Regression model also inclusive of endocrine-related and hematologic-related causes.

**eTable 8. Chronic liver diseases - baseline patient and hospital characteristics at index and subsequent admissions stratified by deciles and presented as 1<sup>th</sup> decile, 5<sup>th</sup> decile, and 10<sup>th</sup> decile.**

| Characteristics                                                          | 1 <sup>th</sup> decile | 5 <sup>th</sup> decile | 10 <sup>th</sup> decile | p-value |
|--------------------------------------------------------------------------|------------------------|------------------------|-------------------------|---------|
| <b>Hospital Characteristics</b>                                          |                        |                        |                         |         |
| Teaching status                                                          |                        |                        |                         |         |
| 1. Metropolitan non-teaching                                             | 17151 (44%)            | 16369 (44%)            | 13788 (37%)             | <0.0001 |
| 2. Metropolitan teaching                                                 | 18707 (47%)            | 18023 (48%)            | 21937 (59%)             |         |
| 3. Non-metropolitan                                                      | 3647 (9%)              | 3182 (8%)              | 1568 (4%)               |         |
| Location                                                                 |                        |                        |                         |         |
| 1. Metropolitan                                                          | 36217 (91%)            | 34392 (92%)            | 35725 (96%)             | <0.0001 |
| 2. Non-metropolitan                                                      | 3647 (9%)              | 3182 (8%)              | 1568 (4%)               |         |
| Bed-size                                                                 |                        |                        |                         |         |
| 1. Small                                                                 | 4449 (11%)             | 3823 (10%)             | 2707 (7%)               | <0.0001 |
| 2. Medium                                                                | 9861 (25%)             | 8901 (24%)             | 7461 (20%)              |         |
| 3. Large                                                                 | 25554 (64%)            | 24850 (66%)            | 27125 (73%)             |         |
| <b>Patient Characteristics</b>                                           |                        |                        |                         |         |
| Mean age                                                                 | 55.8 ± 16.6            | 59.6 ± 16.6            | 57.7 ± 15.1             | <0.0001 |
| Female sex                                                               | 18793 (47%)            | 17582 (47%)            | 16207 (43%)             | <0.0001 |
| Length of stay (unadjusted by month of follow-up)                        |                        |                        |                         |         |
| • Median                                                                 | 1                      | 5                      | 11                      | <0.001  |
| • IQR                                                                    | 1-2                    | 4-6                    | 5-26                    |         |
| • 5 <sup>th</sup> – 95 <sup>th</sup> range                               | 1-2                    | 2-7                    | 2-54                    |         |
| Primary expected payer                                                   |                        |                        |                         |         |
| 1. Medicare/Medicaid                                                     | 21415 (54%)            | 23915 (64%)            | 27311 (73%)             | <0.0001 |
| 2. Private insurance                                                     | 11362 (29%)            | 8104 (22%)             | 6191 (17%)              |         |
| 3. Self-pay                                                              | 4102 (10%)             | 3074 (8%)              | 1890 (5%)               |         |
| 4. No charge/others                                                      | 2926 (7%)              | 2420 (6%)              | 1868 (5%)               |         |
| Median household income                                                  |                        |                        |                         |         |
| 1. 0-25 <sup>th</sup> percentile (\$1 - \$37,99)                         | 11057 (28%)            | 11153 (30%)            | 12361 (34%)             | <0.0001 |
| 2. 26 <sup>th</sup> to 50 <sup>th</sup> percentile (\$38,000 - \$47,999) | 10368 (27%)            | 9890 (27%)             | 9186 (25%)              |         |



|                                                                          |             |             |             |         |
|--------------------------------------------------------------------------|-------------|-------------|-------------|---------|
| 3. 51 <sup>st</sup> to 75 <sup>th</sup> percentile (\$48,000 - \$63,999) | 9691 (25%)  | 8765 (24%)  | 8111 (22%)  |         |
| 4. 76 <sup>th</sup> to 100 <sup>th</sup> percentile (\$64,000 or more)   | 7973 (20%)  | 7063 (19%)  | 6917 (19%)  |         |
| <b>Index Hospitalization Comorbidities</b>                               |             |             |             |         |
| Smoking                                                                  | 13427 (34%) | 13157 (35%) | 11054 (30%) | <0.0001 |
| Obesity                                                                  | 4589 (12%)  | 4854 (13%)  | 4897 (13%)  | <0.0001 |
| Anemia                                                                   | 5085 (13%)  | 8694 (23%)  | 12353 (33%) | <0.0001 |
| Congestive heart failure                                                 | 2060 (5%)   | 3571 (10%)  | 5994 (16%)  | <0.0001 |
| Chronic lung disease                                                     | 6400 (16%)  | 7729 (21%)  | 8754 (23%)  | <0.0001 |
| Depression (combine uncomplicated and complicated)                       | 4737 (12%)  | 4769 (13%)  | 4739 (13%)  | <0.0001 |
| Diabetes (combine uncomplicated and complicated)                         | 7963 (20%)  | 8257 (22%)  | 8434 (23%)  | <0.0001 |
| Hypertension (combine uncomplicated and complicated)                     | 19209 (48%) | 19659 (52%) | 19007 (51%) | <0.0001 |
| Coagulation disorder                                                     | 4492 (11%)  | 6408 (17%)  | 8754 (23%)  | <0.0001 |
| Electrolyte abnormalities                                                | 11026 (28%) | 15139 (40%) | 19057 (51%) | <0.0001 |
| Peripheral vascular disease                                              | 1487 (4%)   | 1947 (5%)   | 2786 (7%)   | <0.0001 |
| Psychoses                                                                | 2061 (5%)   | 2442 (7%)   | 3259 (9%)   | <0.0001 |
| Renal failure                                                            | 3435 (9%)   | 5045 (13%)  | 8829 (24%)  | <0.0001 |
| <b>Index Hospitalization Characteristics</b>                             |             |             |             |         |
| Gastrointestinal or hepatic procedures                                   | 7253 (18%)  | 10108 (27%) | 12891 (35%) | <0.0001 |
| Blood transfusions                                                       | 2458 (6%)   | 4633 (12%)  | 9727 (26%)  | <0.0001 |
| Parenteral or enteral nutrition                                          | 45 (0.1%)   | 395 (1%)    | 3122 (8%)   | <0.0001 |

|                                                                         |             |             |             |         |
|-------------------------------------------------------------------------|-------------|-------------|-------------|---------|
| Liver related procedures                                                | 1274 (3%)   | 2992 (8%)   | 4975 (13%)  | <0.0001 |
| Liver transplantations                                                  | 1 (0%)      | 65 (0.2%)   | 218 (0.6%)  | <0.0001 |
| Unadjusted mortality                                                    | 3978 (10%)  | 2011 (5%)   | 1572 (4%)   | <0.0001 |
| <b>Hospitalization Characteristics Across All Subsequent Admissions</b> |             |             |             |         |
| Gastrointestinal or hepatic procedures                                  |             |             |             |         |
| 1. 0                                                                    | 32569 (82%) | 26016 (69%) | 16302 (44%) | <0.0001 |
| 2. 1                                                                    | 7260 (18%)  | 10178 (27%) | 11380 (31%) |         |
| 3. 2                                                                    | 35 (0.1%)   | 1240 (3%)   | 4979 (13%)  |         |
| 4. 3 or more                                                            | 0 (0%)      | 140 (0.4%)  | 4632 (12%)  |         |
| Blood transfusions                                                      |             |             |             |         |
| 1. 0                                                                    | 37393 (94%) | 32017 (85%) | 18924 (51%) | <0.0001 |
| 2. 1                                                                    | 2462 (6%)   | 4971 (13%)  | 10120 (27%) |         |
| 3. 2                                                                    | 9 (0.02%)   | 520 (1%)    | 4343 (12%)  |         |
| 4. 3 or more                                                            | 0 (0%)      | 66 (0.2%)   | 3906 (10%)  |         |
| Parenteral or enteral nutrition                                         |             |             |             |         |
| 1. 0                                                                    | 39819 (99%) | 37130 (9%)  | 31369 (84%) | <0.0001 |
| 2. 1                                                                    | 45 (0.1%)   | 429 (1%)    | 4775 (13%)  |         |
| 3. 2                                                                    | 0 (0%)      | 5 (0%)      | 744 (2%)    |         |
| 4. 3 or more                                                            | 0 (0%)      | 0 (0%)      | 405 (1%)    |         |
| Liver related procedures                                                |             |             |             |         |
| 1. 0                                                                    | 38573 (97%) | 34108 (91%) | 28520 (76%) | <0.0001 |
| 2. 1                                                                    | 1280 (3%)   | 3061 (8%)   | 4937 (13%)  |         |
| 3. 2                                                                    | 11 (0%)     | 339 (1%)    | 1819 (5%)   |         |
| 4. 3 or more                                                            | 0 (0%)      | 66 (0.2%)   | 2017 (5%)   |         |
| Liver transplantations                                                  |             |             |             |         |
| 1. 0                                                                    | 39862 (99%) | 37503 (99%) | 36631 (98%) | <0.0001 |
| 2. 1                                                                    | 2 (0%)      | 71 (0.2%)   | 651 (2%)    |         |
| 3. 2                                                                    | 0 (0%)      | 0 (0%)      | 10 (0%)     |         |
| 4. 3 or more                                                            | 0 (0%)      | 0 (0%)      | 1 (0%)      |         |
| Unadjusted mortality                                                    | 4009 (10%)  | 2738 (7%)   | 6137 (16%)  | <0.0001 |

**eTable 9.** Risk factors for high utilization of healthcare resources in patients with chronic liver disease.

| <b>Variable at Index Hospitalization</b>                                  | <b>Odds Ratio (95% Confidence Interval)</b> | <b>p-value</b> |
|---------------------------------------------------------------------------|---------------------------------------------|----------------|
| Age                                                                       | 0.99 (0.98 – 0.99)                          | <0.01          |
| Female                                                                    | 0.91 (0.89 – 0.93)                          | <0.01          |
| Payer (reference is medicare/medicaid)                                    |                                             |                |
| Private insurance                                                         | 0.65 (0.63 – 0.67)                          | <0.01          |
| Self-pay                                                                  | 0.53 (0.50 – 0.56)                          |                |
| Other                                                                     | 0.64 (0.60 – 0.67)                          |                |
| Urban versus rural location                                               | 0.57 (0.54 – 0.60)                          | <0.01          |
| Median household income quartiles (reference is 1 <sup>st</sup> quartile) |                                             |                |
| 2 <sup>nd</sup> quartile                                                  | 0.91 (0.88 – 0.94)                          | <0.01          |
| 3 <sup>rd</sup> quartile                                                  | 0.88 (0.85 – 0.91)                          | <0.01          |
| 4 <sup>th</sup> quartile                                                  | 0.97 (0.94 – 1.00)                          | 0.05           |
| Hospital bed size (reference is small)                                    |                                             |                |
| Medium                                                                    | 1.06 (1.01 – 1.11)                          | 0.02           |
| Large                                                                     | 1.35 (1.30 – 1.41)                          | <0.01          |
| Charlson Comorbidity Index                                                |                                             |                |
| 1 or less                                                                 | 1.55 (1.49 – 1.61)                          | <0.01          |
| 2 or more                                                                 | 2.98 (2.89 – 3.07)                          | <0.01          |
| Liver-specific procedures                                                 | 1.31 (1.25 – 1.38)                          | <0.01          |
| Liver-related admission (reference)                                       |                                             |                |
| Respiratory-related                                                       | 1.07 (1.02 – 1.12)                          | <0.01          |
| Infection-related                                                         | 1.54 (1.48 – 1.60)                          | <0.01          |
| Genitourinary-related                                                     | 0.78 (0.66 – 0.94)                          | <0.01          |
| Gastrointestinal-related                                                  | 0.90 (0.87 – 0.94)                          | <0.01          |

|                     |                    |       |
|---------------------|--------------------|-------|
| Endocrine-related   | 1.16 (1.09 – 1.24) | <0.01 |
| Hematologic-related | 1.05 (0.98 – 1.12) | 0.20  |
| Other causes        | 1.22 (1.18 – 1.26) | <0.01 |

\*Regression model also inclusive of depression, obesity, cardiac-related and neuropsychiatric-related admissions. Liver specific procedures included injection/ligation of esophageal varices, abdominal paracentesis, liver biopsies, and creation of vascular bypass and shunt, not heart.

**eTable 10. Functional gastrointestinal disorders - baseline patient and hospital characteristics at index and subsequent admissions stratified by deciles and presented as 1<sup>th</sup> decile, 5<sup>th</sup> decile, and 10<sup>th</sup> decile.**

| Characteristics                                                          | 1 <sup>th</sup> decile | 5 <sup>th</sup> decile | 10 <sup>th</sup> decile | p-value  |
|--------------------------------------------------------------------------|------------------------|------------------------|-------------------------|----------|
| <b>Hospital Characteristics</b>                                          |                        |                        |                         |          |
| Teaching status                                                          |                        |                        |                         |          |
| 1. Metropolitan non-teaching                                             | 15250 (43%)            | 14417 (42%)            | 12996 (37%)             | <0.0001  |
| 2. Metropolitan teaching                                                 | 16846 (47%)            | 16099 (47%)            | 20015 (57%)             |          |
| 3. Non-metropolitan                                                      | 3549 (10%)             | 3485 (10%)             | 1899 (5%)               |          |
| Location                                                                 |                        |                        |                         |          |
| 1. Metropolitan                                                          | 32096 (90%)            | 30516 (90%)            | 33011 (95%)             | <0.0001  |
| 2. Non-metropolitan                                                      | 3549 (10%)             | 3485 (10%)             | 1899 (5%)               |          |
| Bed-size                                                                 |                        |                        |                         |          |
| 1. Small                                                                 | 4427 (12%)             | 3812 (11%)             | 2687 (8%)               | <0.0001  |
| 2. Medium                                                                | 8805 (25%)             | 8125 (24%)             | 7157 (21%)              |          |
| 3. Large                                                                 | 22413 (63%)            | 22064 (65%)            | 25066 (72%)             |          |
| <b>Patient Characteristics</b>                                           |                        |                        |                         |          |
| Mean age                                                                 | 59.9 ± 19.0            | 65.0 ± 18.4            | 59.7 ± 17.8             | <0.00001 |
| Female sex                                                               | 23163 (65%)            | 21319 (63%)            | 19835 (57%)             | <0.0001  |
| Length of stay (unadjusted by month of follow-up)                        |                        |                        |                         |          |
| • Median                                                                 | 1                      | 5                      | 10                      | <0.0001  |
| • IQR                                                                    | 1-2                    | 4-6                    | 5-21                    |          |
| • 5 <sup>th</sup> – 95 <sup>th</sup> range                               | 1-2                    | 2-7                    | 2-47                    |          |
| Primary expected payer                                                   |                        |                        |                         |          |
| 1. Medicare/Medicaid                                                     | 21432 (60%)            | 24557 (72%)            | 27252 (78%)             | <0.0001  |
| 2. Private insurance                                                     | 10756 (30%)            | 6904 (20%)             | 5519 (16%)              |          |
| 3. Self-pay                                                              | 1842 (5%)              | 1216 (4%)              | 1013 (3%)               |          |
| 4. No charge/others                                                      | 1588 (4%)              | 1287 (4%)              | 1092 (3%)               |          |
| Median household income                                                  |                        |                        |                         |          |
| 1. 0-25 <sup>th</sup> percentile (\$1 - \$37,99)                         | 9130 (26%)             | 9331 (28%)             | 11179 (33%)             | <0.0001  |
| 2. 26 <sup>th</sup> to 50 <sup>th</sup> percentile (\$38,000 - \$47,999) | 9354 (27%)             | 8926 (27%)             | 8733 (25%)              |          |

|                                                                          |             |             |             |         |
|--------------------------------------------------------------------------|-------------|-------------|-------------|---------|
| 3. 51 <sup>st</sup> to 75 <sup>th</sup> percentile (\$48,000 - \$63,999) | 8946 (25%)  | 8171 (24%)  | 7797 (23%)  |         |
| 4. 76 <sup>th</sup> to 100 <sup>th</sup> percentile (\$64,000 or more)   | 7671 (22%)  | 7004 (21%)  | 6646 (19%)  |         |
| <b>Index Hospitalization Comorbidities</b>                               |             |             |             |         |
| Smoking                                                                  | 9411 (26%)  | 9487 (28%)  | 9331 (27%)  | <0.0001 |
| Obesity                                                                  | 3851 (11%)  | 4501 (13%)  | 5223 (15%)  | <0.0001 |
| Anemia                                                                   | 4525 (13%)  | 7814 (23%)  | 12132 (35%) | <0.0001 |
| Congestive heart failure                                                 | 1587 (4%)   | 3236 (10%)  | 5183 (15%)  | <0.0001 |
| Chronic lung disease                                                     | 6166 (17%)  | 7581 (22%)  | 9135 (26%)  | <0.0001 |
| Depression (combine uncomplicated and complicated)                       | 5902 (17%)  | 5633 (17%)  | 5917 (17%)  | 0.29    |
| Diabetes (combine uncomplicated and complicated)                         | 5638 (16%)  | 6750 (20%)  | 7360 (21%)  | <0.0001 |
| Hypertension (combine uncomplicated and complicated)                     | 18237 (51%) | 20142 (59%) | 20036 (57%) | <0.0001 |
| Coagulation disorder                                                     | 864 (2%)    | 1846 (5%)   | 3108 (9%)   | <0.0001 |
| Liver disorder                                                           | 1024 (3%)   | 1199 (4%)   | 1785 (5%)   | <0.0001 |
| Electrolyte abnormalities                                                | 7915 (22%)  | 11638 (34%) | 15334 (44%) | <0.0001 |
| Peripheral vascular disease                                              | 1489 (4%)   | 2269 (7%)   | 3044 (9%)   | <0.0001 |
| Psychoses                                                                | 1679 (5%)   | 1977 (6%)   | 2882 (8%)   | <0.0001 |
| Renal failure                                                            | 2844 (8%)   | 4506 (13%)  | 8033 (23%)  | <0.0001 |
| <b>Index Hospitalization Characteristics</b>                             |             |             |             |         |
| Gastrointestinal or hepatic procedures                                   | 5457 (15%)  | 6075 (18%)  | 8283 (24%)  | <0.0001 |
| Blood transfusions                                                       | 1260 (4%)   | 3341 (10%)  | 6651 (19%)  | <0.0001 |

|                                                                         |             |             |             |         |
|-------------------------------------------------------------------------|-------------|-------------|-------------|---------|
| Parenteral or enteral nutrition                                         | 51 (0.1%)   | 300 (0.9%)  | 2280 (7%)   | <0.0001 |
| Unadjusted mortality                                                    | 850 (2%)    | 571 (2%)    | 429 (1%)    | <0.0001 |
| <b>Hospitalization Characteristics Across All Subsequent Admissions</b> |             |             |             |         |
| Gastrointestinal or hepatic procedures                                  |             |             |             |         |
| 1. 0                                                                    | 30145 (85%) | 26876 (79%) | 18513 (53%) | <0.0001 |
| 2. 1                                                                    | 5483 (15%)  | 6647 (20%)  | 9787 (28%)  |         |
| 3. 2                                                                    | 17 (0.1%)   | 455 (1%)    | 4048 (12%)  |         |
| 4. 3 or more                                                            | 0 (0%)      | 23 (0.1%)   | 2562 (7%)   |         |
| Blood transfusions                                                      |             |             |             |         |
| 1. 0                                                                    | 34371 (96%) | 30084 (88%) | 20185 (58%) | <0.0001 |
| 2. 1                                                                    | 1262 (4%)   | 3646 (11%)  | 8098 (23%)  |         |
| 3. 2                                                                    | 12 (0%)     | 240 (1%)    | 3652 (10%)  |         |
| 4. 3 or more                                                            | 0 (0%)      | 31 (0.1%)   | 2975 (9%)   |         |
| Parenteral or enteral nutrition                                         |             |             |             |         |
| 1. 0                                                                    | 35594 (99%) | 33655 (99%) | 29472 (84%) | <0.0001 |
| 2. 1                                                                    | 51 (0.1%)   | 332 (1%)    | 3928 (11%)  |         |
| 3. 2                                                                    | 0 (0%)      | 14 (0%)     | 891 (3%)    |         |
| 4. 3 or more                                                            | 0 (0%)      | 0 (0%)      | 619 (2%)    |         |
| Unadjusted mortality                                                    | 143 (6%)    | 164 (5%)    | 696 (13%)   | <0.0001 |

**eTable 11.** Risk factors for high utilization of healthcare resources in patients with functional GI disorders.

| <b>Variable at Index Hospitalization</b>                                  | <b>Odds Ratio (95% Confidence Interval)</b> | <b>p-value</b> |
|---------------------------------------------------------------------------|---------------------------------------------|----------------|
| Age                                                                       | 0.98 (0.97 – 0.98)                          | <0.01          |
| Female                                                                    | 0.85 (0.83 – 0.87)                          | <0.01          |
| Payer (reference is medicare/medicaid)                                    |                                             |                |
| Private insurance                                                         | 0.58 (0.56 – 0.60)                          | <0.01          |
| Self-pay                                                                  | 0.56 (0.52 – 0.60)                          |                |
| Other                                                                     | 0.61 (0.57 – 0.65)                          |                |
| Urban versus rural location                                               | 0.59 (0.56 – 0.62)                          | <0.01          |
| Median household income quartiles (reference is 1 <sup>st</sup> quartile) |                                             |                |
| 2 <sup>nd</sup> quartile                                                  | 0.90 (0.87 – 0.93)                          | <0.01          |
| 3 <sup>rd</sup> quartile                                                  | 0.88 (0.85 – 0.90)                          |                |
| 4 <sup>th</sup> quartile                                                  | 0.93 (0.90 – 0.96)                          |                |
| Hospital bed size (reference is small)                                    |                                             |                |
| Medium                                                                    | 1.13 (1.08 – 1.19)                          | <0.01          |
| Large                                                                     | 1.40 (1.34 – 1.46)                          |                |
| Charlson Comorbidity Index                                                |                                             |                |
| 1 or less                                                                 | 1.52 (1.46 – 1.57)                          | <0.01          |
| 2 or more                                                                 | 3.10 (3.02 – 3.20)                          |                |
| Functional-related admission (reference)                                  |                                             |                |
| Cardiac-related                                                           | 1.22 (1.14 – 1.31)                          | <0.01          |
| Respiratory-related                                                       | 1.48 (1.38 – 1.59)                          | <0.01          |
| Infection-related                                                         | 1.60 (1.49 – 1.72)                          | <0.01          |
| Genitourinary-related                                                     | 0.80 (0.68 – 0.94)                          | <0.01          |
| Gastrointestinal-related                                                  | 1.17 (1.10 – 1.26)                          | <0.01          |



|                          |                    |       |
|--------------------------|--------------------|-------|
| Endocrine-related        | 1.53 (1.42 – 1.65) | <0.01 |
| Neuropsychiatric-related | 1.57 (1.44 – 1.72) | <0.01 |
| Hematologic-related      | 1.38 (1.26 – 1.51) | <0.01 |
| Other causes             | 1.46 (1.37 – 1.56) | <0.01 |

\*Regression model also inclusive of obesity.

**eTable 12. Gastrointestinal hemorrhage - baseline patient and hospital characteristics at index and subsequent admissions stratified by deciles and presented as 1<sup>th</sup> decile, 5<sup>th</sup> decile, and 10<sup>th</sup> decile.**

| Characteristics                                                          | 1 <sup>th</sup> decile | 5 <sup>th</sup> decile | 10 <sup>th</sup> decile | p-value  |
|--------------------------------------------------------------------------|------------------------|------------------------|-------------------------|----------|
| <b>Hospital Characteristics</b>                                          |                        |                        |                         |          |
| Teaching status                                                          |                        |                        |                         |          |
| 1. Metropolitan non-teaching                                             | 9632 (48%)             | 7890 (46%)             | 7520 (40%)              | <0.0001  |
| 2. Metropolitan teaching                                                 | 8086 (40%)             | 7251 (43%)             | 10301 (55%)             |          |
| 3. Non-metropolitan                                                      | 2336 (12%)             | 1865 (11%)             | 1043 (6%)               |          |
| Location                                                                 |                        |                        |                         |          |
| 1. Metropolitan                                                          | 17718 (88%)            | 15141 (89%)            | 17821 (94%)             | <0.0001  |
| 2. Non-metropolitan                                                      | 2336 (12%)             | 1865 (11%)             | 1043 (6%)               |          |
| Bed-size                                                                 |                        |                        |                         |          |
| 1. Small                                                                 | 2527 (13%)             | 1852 (11%)             | 1332 (7%)               | <0.0001  |
| 2. Medium                                                                | 5275 (26%)             | 4367 (26%)             | 4251 (23%)              |          |
| 3. Large                                                                 | 12252 (61%)            | 10787 (63%)            | 13281 (70%)             |          |
| <b>Patient Characteristics</b>                                           |                        |                        |                         |          |
| Mean age                                                                 | 64.1 ± 18.0            | 69.5 ± 16.1            | 65.4 ± 15.6             | <0.00001 |
| Female sex                                                               | 9007 (45%)             | 8465 (50%)             | 8958 (47%)              | <0.0001  |
| Length of stay (unadjusted by month of follow-up)                        |                        |                        |                         |          |
| • Median                                                                 | 1                      | 5                      | 12                      | <0.00001 |
| • IQR                                                                    | 1-2                    | 3-6                    | 6-27                    |          |
| • 5 <sup>th</sup> – 95 <sup>th</sup> range                               | 1-2                    | 2-7                    | 2-56                    |          |
| Primary expected payer                                                   |                        |                        |                         |          |
| 1. Medicare/Medicaid                                                     | 12625 (63%)            | 13005 (77%)            | 15326 (81%)             | <0.0001  |
| 2. Private insurance                                                     | 4763 (24%)             | 2523 (15%)             | 2324 (12%)              |          |
| 3. Self-pay                                                              | 1586 (8%)              | 825 (5%)               | 584 (3%)                |          |
| 4. No charge/others                                                      | 1061 (5%)              | 634 (4%)               | 615 (3%)                |          |
| Median household income                                                  |                        |                        |                         |          |
| 1. 0-25 <sup>th</sup> percentile (\$1 - \$37,99)                         | 5113 (26%)             | 4943 (30%)             | 6060 (33%)              | <0.0001  |
| 2. 26 <sup>th</sup> to 50 <sup>th</sup> percentile (\$38,000 - \$47,999) | 5253 (27%)             | 4665 (28%)             | 4713 (25%)              |          |

|                                                                          |             |             |             |         |
|--------------------------------------------------------------------------|-------------|-------------|-------------|---------|
| 3. 51 <sup>st</sup> to 75 <sup>th</sup> percentile (\$48,000 - \$63,999) | 5069 (26%)  | 3924 (23%)  | 4164 (22%)  |         |
| 4. 76 <sup>th</sup> to 100 <sup>th</sup> percentile (\$64,000 or more)   | 4237 (22%)  | 3201 (19%)  | 3629 (20%)  |         |
| <b>Index Hospitalization Comorbidities</b>                               |             |             |             |         |
| Smoking                                                                  | 5409 (27%)  | 4467 (26%)  | 4105 (22%)  | <0.0001 |
| Obesity                                                                  | 1571 (8%)   | 1635 (10%)  | 2445 (13%)  | <0.0001 |
| Anemia                                                                   | 3502 (17%)  | 3941 (23%)  | 6099 (32%)  | <0.0001 |
| Congestive heart failure                                                 | 1437 (7%)   | 2549 (15%)  | 4795 (25%)  | <0.0001 |
| Chronic lung disease                                                     | 2966 (15%)  | 3580 (21%)  | 5076 (27%)  | <0.0001 |
| Depression (combine uncomplicated and complicated)                       | 1813 (9%)   | 1844 (11%)  | 2050 (11%)  | <0.0001 |
| Diabetes (combine uncomplicated and complicated)                         | 3739 (19%)  | 4029 (24%)  | 4790 (25%)  | <0.0001 |
| Hypertension (combine uncomplicated and complicated)                     | 11373 (57%) | 10868 (64%) | 11169 (59%) | <0.0001 |
| Coagulation disorder                                                     | 1357 (7%)   | 1933 (11%)  | 3575 (19%)  | <0.0001 |
| Liver disorder                                                           | 1358 (7%)   | 1482 (9%)   | 2171 (12%)  | <0.0001 |
| Electrolyte abnormalities                                                | 4820 (24%)  | 6242 (37%)  | 10106 (54%) | <0.0001 |
| Peripheral vascular disease                                              | 1096 (5%)   | 1501 (9%)   | 2115 (11%)  | <0.0001 |
| Psychoses                                                                | 577 (3%)    | 650 (4%)    | 1216 (6%)   | <0.0001 |
| Renal failure                                                            | 2109 (11%)  | 3230 (19%)  | 6077 (32%)  | <0.0001 |
| <b>Index Hospitalization Characteristics</b>                             |             |             |             |         |
| Gastrointestinal or hepatic procedures                                   | 11907 (59%) | 11747 (69%) | 13016 (69%) | <0.0001 |
| Blood transfusions                                                       | 6375 (32%)  | 8183 (48%)  | 9904 (53%)  | <0.0001 |

|                                                                         |            |            |            |         |
|-------------------------------------------------------------------------|------------|------------|------------|---------|
| Parenteral or enteral nutrition                                         | 38 (0.2%)  | 183 (1%)   | 2007 (11%) | <0.0001 |
| Unadjusted mortality                                                    | 2031 (10%) | 801 (5%)   | 1049 (6%)  | <0.0001 |
| <b>Hospitalization Characteristics Across All Subsequent Admissions</b> |            |            |            |         |
| Gastrointestinal or hepatic procedures                                  |            |            |            |         |
| 1. 0                                                                    | 1124 (42%) | 611 (20%)  | 685 (14%)  | <0.0001 |
| 2. 1                                                                    | 1453 (55%) | 1894 (62%) | 1824 (37%) |         |
| 3. 2                                                                    | 63 (2%)    | 474 (15%)  | 1018 (21%) |         |
| 4. 3 or more                                                            | 10 (0.4%)  | 87 (3%)    | 1371 (28%) |         |
| Blood transfusions                                                      |            |            |            |         |
| 1. 0                                                                    | 1644 (62%) | 1375 (45%) | 1440 (29%) | <0.0001 |
| 2. 1                                                                    | 956 (36%)  | 1365 (45%) | 1490 (30%) |         |
| 3. 2                                                                    | 44 (2%)    | 268 (9%)   | 877 (18%)  |         |
| 4. 3 or more                                                            | 6 (0.2%)   | 58 (2%)    | 1091 (22%) |         |
| Parenteral or enteral nutrition                                         |            |            |            |         |
| 1. 0                                                                    | 2644 (99%) | 3012 (98%) | 4017 (82%) | <0.0001 |
| 2. 1                                                                    | 6 (0.2%)   | 52 (2%)    | 718 (15%)  |         |
| 3. 2                                                                    | 0 (0%)     | 2 (0.1%)   | 112 (2%)   |         |
| 4. 3 or more                                                            | 0 (0%)     | 0 (0%)     | 51 (1%)    |         |
| Unadjusted mortality                                                    | 2044 (10%) | 1126 (7%)  | 2521 (19%) | <0.0001 |

**eTable 13.** Risk factors for high utilization of healthcare resources in patients with gastrointestinal hemorrhage.

| <b>Variable at Index Hospitalization</b>                                  | <b>Odds Ratio (95% Confidence Interval)</b> | <b>p-value</b> |
|---------------------------------------------------------------------------|---------------------------------------------|----------------|
| Age                                                                       | 0.98 (0.98 – 0.99)                          | <0.01          |
| Female                                                                    | 1.03 (0.99 – 1.07)                          | 0.05           |
| Payer (reference is medicare/medicaid)                                    |                                             |                |
| Private insurance                                                         | 0.60 (0.57 – 0.63)                          | <0.01          |
| Self-pay                                                                  | 0.45 (0.41 – 0.50)                          |                |
| Other                                                                     | 0.57 (0.52 – 0.62)                          |                |
| Urban versus rural location                                               | 0.56 (0.53 – 0.60)                          | <0.01          |
| Median household income quartiles (reference is 1 <sup>st</sup> quartile) |                                             |                |
| 2 <sup>nd</sup> quartile                                                  | 0.90 (0.87 – 0.94)                          | <0.01          |
| 3 <sup>rd</sup> quartile                                                  | 0.89 (0.86 – 0.93)                          |                |
| Hospital bed size (reference is small)                                    |                                             |                |
| Medium                                                                    | 1.19 (1.11 – 1.27)                          | <0.01          |
| Large                                                                     | 1.50 (1.41 – 1.60)                          |                |
| Charlson Comorbidity Index                                                |                                             |                |
| 1 or less                                                                 | 1.48 (1.40 – 1.56)                          | <0.01          |
| 2 or more                                                                 | 2.88 (2.75 – 3.02)                          |                |
| Obesity                                                                   | 1.19 (1.13 – 1.24)                          | <0.01          |
| GI-bleed related admission (reference)                                    |                                             |                |
| Cardiac-related                                                           | 2.43 (2.29 – 2.59)                          | <0.01          |
| Respiratory-related                                                       | 3.00 (2.79 – 3.22)                          | <0.01          |
| Genitourinary-related                                                     | 1.89 (1.34 – 2.68)                          | <0.01          |
| Gastrointestinal-related                                                  | 1.37 (1.31 – 1.43)                          | <0.01          |
| Endocrine-related                                                         | 2.71 (2.43 – 3.03)                          | <0.01          |

|                     |                    |       |
|---------------------|--------------------|-------|
| Hematologic-related | 2.27 (1.98 – 2.60) | <0.01 |
| Other causes        | 1.45 (1.34 – 1.58) | <0.01 |

\*Regression model also inclusive of infection-related and neuropsychiatric-related admission and fourth quartile of income.

**eTable 14. Pancreatic disease - baseline patient and hospital characteristics at index admission stratified by deciles and presented as 1<sup>th</sup> decile, 5<sup>th</sup> decile, and 10<sup>th</sup> decile.**

| Characteristics                                                          | 1 <sup>th</sup> decile | 5 <sup>th</sup> decile | 10 <sup>th</sup> decile | p-value  |
|--------------------------------------------------------------------------|------------------------|------------------------|-------------------------|----------|
| <b>Hospital Characteristics</b>                                          |                        |                        |                         |          |
| Teaching status                                                          |                        |                        |                         |          |
| 1. Metropolitan non-teaching                                             | 5168 (47%)             | 3457 (47%)             | 3716 (39%)              | <0.0001  |
| 2. Metropolitan teaching                                                 | 4424 (40%)             | 3126 (43%)             | 5375 (56%)              |          |
| 3. Non-metropolitan                                                      | 1385 (13%)             | 767 (10%)              | 557 (6%)                |          |
| Location                                                                 |                        |                        |                         |          |
| 1. Metropolitan                                                          | 9592 (87%)             | 6583 (90%)             | 9091 (94%)              | <0.0001  |
| 2. Non-metropolitan                                                      | 1385 (13%)             | 767 (10%)              | 557 (6%)                |          |
| Bed-size                                                                 |                        |                        |                         |          |
| 1. Small                                                                 | 1546 (14%)             | 867 (12%)              | 703 (7%)                | <0.0001  |
| 2. Medium                                                                | 2829 (26%)             | 1867 (25%)             | 2049 (21%)              |          |
| 3. Large                                                                 | 6602 (60%)             | 4616 (63%)             | 6896 (71%)              |          |
| <b>Patient Characteristics</b>                                           |                        |                        |                         |          |
| Mean age                                                                 | 53.5 ± 17.6            | 56.5 ± 18.0            | 55.4 ± 16.8             | <0.00001 |
| Female sex                                                               | 5327 (49%)             | 3800 (52%)             | 4534 (47%)              | <0.0001  |
| Length of stay (unadjusted by month of follow-up)                        |                        |                        |                         |          |
| • Median                                                                 | 1                      | 5                      | 10                      | <0.00001 |
| • IQR                                                                    | 1-2                    | 4-5                    | 5-21                    |          |
| • 5 <sup>th</sup> – 95 <sup>th</sup> range                               | 1-2                    | 2-7                    | 2-49                    |          |
| Primary expected payer                                                   |                        |                        |                         |          |
| 1. Medicare/Medicaid                                                     | 5270 (48%)             | 4053 (55%)             | 6682 (69%)              | <0.0001  |
| 2. Private insurance                                                     | 3569 (33%)             | 2095 (29%)             | 1820 (19%)              |          |
| 3. Self-pay                                                              | 1396 (13%)             | 749 (10%)              | 637 (7%)                |          |
| 4. No charge/others                                                      | 734 (7%)               | 442 (6%)               | 500 (5%)                |          |
| Median household income                                                  |                        |                        |                         |          |
| 1. 0-25 <sup>th</sup> percentile (\$1 - \$37,99)                         | 3066 (28%)             | 2044 (28%)             | 3132 (33%)              | <0.0001  |
| 2. 26 <sup>th</sup> to 50 <sup>th</sup> percentile (\$38,000 - \$47,999) | 2937 (27%)             | 2004 (28%)             | 2403 (25%)              |          |

|                                                                          |            |            |            |         |
|--------------------------------------------------------------------------|------------|------------|------------|---------|
| 3. 51 <sup>st</sup> to 75 <sup>th</sup> percentile (\$48,000 - \$63,999) | 2742 (25%) | 1735 (24%) | 2128 (22%) |         |
| 4. 76 <sup>th</sup> to 100 <sup>th</sup> percentile (\$64,000 or more)   | 2057 (19%) | 1421 (20%) | 1837 (19%) |         |
| <b>Index Hospitalization Comorbidities</b>                               |            |            |            |         |
| Smoking                                                                  | 3711 (34%) | 2392 (33%) | 2815 (29%) | <0.0001 |
| Obesity                                                                  | 1195 (11%) | 1049 (14%) | 1030 (11%) | <0.0001 |
| Anemia                                                                   | 1024 (9%)  | 1269 (17%) | 3025 (31%) | <0.0001 |
| Congestive heart failure                                                 | 318 (3%)   | 372 (5%)   | 1183 (12%) | <0.0001 |
| Chronic lung disease                                                     | 1336 (12%) | 1151 (16%) | 2087 (22%) | <0.0001 |
| Depression (combine uncomplicated and complicated)                       | 1180 (11%) | 903 (12%)  | 1456 (15%) | <0.0001 |
| Diabetes (combine uncomplicated and complicated)                         | 2351 (21%) | 1709 (23%) | 2444 (25%) | <0.0001 |
| Hypertension (combine uncomplicated and complicated)                     | 5304 (48%) | 4051 (55%) | 5244 (54%) | <0.0001 |
| Coagulation disorder                                                     | 470 (4%)   | 553 (8%)   | 1425 (15%) | <0.0001 |
| Liver disorder                                                           | 973 (9%)   | 802 (11%)  | 1388 (14%) | <0.0001 |
| Electrolyte abnormalities                                                | 2919 (27%) | 2869 (39%) | 5185 (54%) | <0.0001 |
| Peripheral vascular disease                                              | 293 (3%)   | 314 (4%)   | 622 (6%)   | <0.0001 |
| Psychoses                                                                | 374 (3%)   | 327 (4%)   | 855 (9%)   | <0.0001 |
| Renal failure                                                            | 640 (6%)   | 648 (9%)   | 2038 (21%) | <0.0001 |
| <b>Index Hospitalization Characteristics</b>                             |            |            |            |         |
| Gastrointestinal or hepatic procedures                                   | 1964 (18%) | 2794 (38%) | 3988 (41%) | <0.0001 |
| Blood transfusions                                                       | 202 (2%)   | 306 (4%)   | 1853 (19%) | <0.0001 |



|                                                                         |             |            |            |         |
|-------------------------------------------------------------------------|-------------|------------|------------|---------|
| Parenteral or enteral nutrition                                         | 12 (0.1%)   | 60 (0.8%)  | 1180 (12%) | <0.0001 |
| Pancreatic-related procedures                                           | 930 (8%)    | 1507 (21%) | 831 (9%)   | <0.0001 |
| Unadjusted mortality                                                    | 430 (4%)    | 94 (1%)    | 283 (3%)   | <0.0001 |
| <b>Hospitalization Characteristics Across All Subsequent Admissions</b> |             |            |            |         |
| Gastrointestinal or hepatic procedures                                  |             |            |            |         |
| 1. 0                                                                    | 8997 (82%)  | 4261 (58%) | 2951 (31%) | <0.0001 |
| 2. 1                                                                    | 1976 (18%)  | 2956 (40%) | 3460 (26%) |         |
| 3. 2                                                                    | 4 (0%)      | 129 (2%)   | 1819 (19%) |         |
| 3 or more                                                               | 0 (0%)      | 4 (0%)     | 1418 (15%) |         |
| Blood transfusions                                                      |             |            |            |         |
| 1. 0                                                                    | 10774 (98%) | 6973 (95%) | 5609 (58%) | <0.0001 |
| 2. 1                                                                    | 203 (2%)    | 365 (5%)   | 2489 (26%) |         |
| 3. 2                                                                    | 0 (0%)      | 10 (0.1%)  | 875 (9%)   |         |
| 3 or more                                                               | 0 (0%)      | 2 (0%)     | 675 (7%)   |         |
| Parenteral or enteral nutrition                                         |             |            |            |         |
| 1. 0                                                                    | 10965 (99%) | 7283 (99%) | 7326 (76%) | <0.0001 |
| 2. 1                                                                    | 12 (0.1%)   | 65 (1%)    | 1755 (18%) |         |
| 3. 2                                                                    | 0 (0%)      | 2 (0%)     | 363 (4%)   |         |
| 3 or more                                                               | 0 (0%)      | 0 (0%)     | 204 (2%)   |         |
| Pancreatic-related procedures                                           |             |            |            |         |
| 1. 0                                                                    | 10040 (91%) | 5731 (78%) | 7993 (83%) | <0.0001 |
| 2. 1                                                                    | 936 (9%)    | 1614 (22%) | 1516 (16%) |         |
| 3. 2                                                                    | 1 (0%)      | 5 (0.1%)   | 124 (1%)   |         |
| 3 or more                                                               | 0 (0%)      | 0 (0%)     | 15 (0.2%)  |         |
| Unadjusted mortality                                                    | 432 (4%)    | 157 (2%)   | 1125 (12%) |         |

**eTable 15.** Risk factors for high utilization of healthcare resources in patients with pancreatic disorders.

| <b>Variable at Index Hospitalization</b>                                  | <b>Odds Ratio (95% Confidence Interval)</b> | <b>p-value</b> |
|---------------------------------------------------------------------------|---------------------------------------------|----------------|
| Age                                                                       | 0.98 (0.98 – 0.99)                          | <0.01          |
| Female                                                                    | 0.88 (0.84 – 0.92)                          | <0.01          |
| Payer (reference is medicare/medicaid)                                    |                                             |                |
| Private insurance                                                         | 0.60 (0.57 – 0.64)                          | <0.01          |
| Self-pay                                                                  | 0.55 (0.51 – 0.61)                          | <0.01          |
| Other                                                                     | 0.69 (0.62 – 0.76)                          | <0.01          |
| Urban versus rural location                                               | 0.60 (0.55 – 0.66)                          | <0.01          |
| Median household income quartiles (reference is 1 <sup>st</sup> quartile) |                                             |                |
| 2 <sup>nd</sup> quartile                                                  | 0.91 (0.86 – 0.96)                          | <0.01          |
| 3 <sup>rd</sup> quartile                                                  | 0.90 (0.85 – 0.95)                          | <0.01          |
| Hospital bed size (reference is small)                                    |                                             |                |
| Medium                                                                    | 1.24 (1.13 – 1.35)                          | <0.01          |
| Large                                                                     | 1.58 (1.45 – 1.71)                          | <0.01          |
| Charlson Comorbidity Index                                                |                                             |                |
| 1 or less                                                                 | 1.59 (1.50 – 1.70)                          | <0.01          |
| 2 or more                                                                 | 2.90 (2.75 – 3.07)                          | <0.01          |
| Obesity                                                                   | 0.87 (0.81 – 0.93)                          | <0.01          |
| Pancreatic-related admission (reference)                                  |                                             |                |
| Cardiac-related                                                           | 1.93 (1.73 – 2.16)                          | <0.01          |
| Respiratory-related                                                       | 2.41 (2.17 – 2.68)                          | <0.01          |
| Infection-related                                                         | 3.00 (2.77 – 3.25)                          | <0.01          |
| Genitourinary-related                                                     | 1.41 (0.96 – 2.08)                          | 0.08           |
| Gastrointestinal-related                                                  | 1.69 (1.58 – 1.82)                          | <0.01          |

|                          |                    |       |
|--------------------------|--------------------|-------|
| Endocrine-related        | 1.81 (1.62 – 2.03) | <0.01 |
| Neuropsychiatric-related | 1.95 (1.72 – 2.20) | <0.01 |
| Hematologic-related      | 1.65 (1.36 – 2.00) | <0.01 |
| Other causes             | 2.21 (2.07 – 2.36) | <0.01 |

\*Regression model also inclusive of fourth quartile of income.

**eTable 16. Preventable admissions in patients with inflammatory bowel diseases stratified by deciles and presented as 1<sup>th</sup> decile, 5<sup>th</sup> decile, and 10<sup>th</sup> decile.**

| <b>Characteristics</b>                               | <b>1<sup>th</sup> decile</b> | <b>5<sup>th</sup> decile</b> | <b>10<sup>th</sup> decile</b> | <b><i>p</i>-value</b> |
|------------------------------------------------------|------------------------------|------------------------------|-------------------------------|-----------------------|
| PQ1. Diabetes, short term complications              | 9 (0.2%)                     | 16 (0.3%)                    | 38 (0.8%)                     | <0.0001               |
| PQ2. Perforated appendix                             | 8 (0.2%)                     | 12 (0.2%)                    | 8 (0.2%)                      | 0.56                  |
| PQ3. Diabetes, long term complications               | 12 (0.2%)                    | 15 (0.3%)                    | 86 (1.8%)                     | <0.0001               |
| PQ5. Chronic obstructive pulmonary disease or asthma | 65 (1%)                      | 116 (2%)                     | 211 (4%)                      | <0.0001               |
| PQ7. Hypertension                                    | 26 (0.5%)                    | 6 (0.1%)                     | 23 (0.5%)                     | <0.0001               |
| PQ8. Congestive Heart Failure                        | 32 (0.6%)                    | 50 (1%)                      | 247 (5%)                      | <0.0001               |
| PQ10. Dehydration                                    | 120 (2%)                     | 108 (2%)                     | 293 (6%)                      | <0.0001               |
| PQ11. Bacterial Pneumonia                            | 73 (1%)                      | 124 (2%)                     | 215 (5%)                      | <0.0001               |
| PQ12. Urinary Tract Infection                        | 51 (0.9%)                    | 61 (1%)                      | 224 (5%)                      | <0.0001               |
| PQ13. Angina without procedure                       | 11 (0.2%)                    | 6 (0.1%)                     | 3 (0.1%)                      | 0.16                  |
| PQ14. Uncontrolled diabetes                          | 4 (0.1%)                     | 5 (0.1%)                     | 12 (0.3%)                     | 0.03                  |
| PQ16. Lower-extremity amputation among diabetics     | 0 (0%)                       | 1 (0.02%)                    | 20 (0.4%)                     | <0.0001               |

**eTable 17. Preventable admissions in patients with chronic liver diseases stratified by deciles and presented as 1<sup>th</sup> decile, 5<sup>th</sup> decile, and 10<sup>th</sup> decile.**

| <b>Characteristics</b>                               | <b>1<sup>th</sup> decile</b> | <b>5<sup>th</sup> decile</b> | <b>10<sup>th</sup> decile</b> | <b><i>p</i>-value</b> |
|------------------------------------------------------|------------------------------|------------------------------|-------------------------------|-----------------------|
| PQ1. Diabetes, short term complications              | 290 (0.7%)                   | 345 (0.9%)                   | 643 (2%)                      | <0.0001               |
| PQ2. Perforated appendix                             | 33 (0.1%)                    | 66 (0.2%)                    | 29 (0.1%)                     | <0.0001               |
| PQ3. Diabetes, long term complications               | 190 (0.5%)                   | 373 (1%)                     | 1685 (5%)                     | <0.0001               |
| PQ5. Chronic obstructive pulmonary disease or asthma | 781 (2%)                     | 1205 (3%)                    | 1946 (5%)                     | <0.0001               |
| PQ7. Hypertension                                    | 368 (0.9%)                   | 194 (0.5%)                   | 279 (0.8%)                    | <0.0001               |
| PQ8. Congestive Heart Failure                        | 722 (2%)                     | 1805 (5%)                    | 4374 (12%)                    | <0.0001               |
| PQ10. Dehydration                                    | 698 (2%)                     | 640 (2%)                     | 1090 (3%)                     | <0.0001               |
| PQ11. Bacterial Pneumonia                            | 737 (2%)                     | 1419 (4%)                    | 1973 (5%)                     | <0.0001               |
| PQ12. Urinary Tract Infection                        | 446 (1%)                     | 692 (2%)                     | 1336 (4%)                     | <0.0001               |
| PQ13. Angina without procedure                       | 101 (0.3%)                   | 42 (0.1%)                    | 72 (0.2%)                     | <0.0001               |
| PQ14. Uncontrolled diabetes                          | 103 (0.3%)                   | 112 (0.3%)                   | 225 (0.6%)                    | <0.0001               |
| PQ16. Lower-extremity amputation among diabetics     | 5 (0%)                       | 28 (0.1%)                    | 444 (1%)                      | <0.0001               |

**eTable 18. Preventable admissions in patients with functional disorders stratified by deciles and presented as 1<sup>th</sup> decile, 5<sup>th</sup> decile, and 10<sup>th</sup> decile.**

| <b>Characteristics</b>                               | <b>1<sup>th</sup> decile</b> | <b>5<sup>th</sup> decile</b> | <b>10<sup>th</sup> decile</b> | <b><i>p</i>-value</b> |
|------------------------------------------------------|------------------------------|------------------------------|-------------------------------|-----------------------|
| PQ1. Diabetes, short term complications              | 326 (0.9%)                   | 407 (1%)                     | 1190 (3%)                     | <0.0001               |
| PQ2. Perforated appendix                             | 34 (0.1%)                    | 62 (0.2%)                    | 20 (0.1%)                     | <0.0001               |
| PQ3. Diabetes, long term complications               | 509 (1%)                     | 796 (2%)                     | 3117 (9%)                     | <0.0001               |
| PQ5. Chronic obstructive pulmonary disease or asthma | 684 (2%)                     | 1482 (4%)                    | 2824 (8%)                     | <0.0001               |
| PQ7. Hypertension                                    | 254 (0.7%)                   | 194 (0.6%)                   | 445 (1%)                      | <0.0001               |
| PQ8. Congestive Heart Failure                        | 416 (1%)                     | 1127 (3%)                    | 3804 (11%)                    | <0.0001               |
| PQ10. Dehydration                                    | 729 (2%)                     | 597 (2%)                     | 1232 (4%)                     | <0.0001               |
| PQ11. Bacterial Pneumonia                            | 639 (2%)                     | 1562 (5%)                    | 2544 (7%)                     | <0.0001               |
| PQ12. Urinary Tract Infection                        | 809 (2%)                     | 1128 (3%)                    | 2268 (7%)                     | <0.0001               |
| PQ13. Angina without procedure                       | 80 (0.2%)                    | 24 (0.1%)                    | 76 (0.2%)                     | <0.0001               |
| PQ14. Uncontrolled diabetes                          | 47 (0.1%)                    | 68 (0.2%)                    | 252 (0.7%)                    | <0.0001               |
| PQ16. Lower-extremity amputation among diabetics     | 2 (0%)                       | 36 (0.1%)                    | 641 (2%)                      | <0.0001               |

**eTable 19. Preventable admissions in patients with gastrointestinal hemorrhage stratified by deciles and presented as 1<sup>th</sup> decile, 5<sup>th</sup> decile, and 10<sup>th</sup> decile.**

| <b>Characteristics</b>                               | <b>1<sup>th</sup> decile</b> | <b>5<sup>th</sup> decile</b> | <b>10<sup>th</sup> decile</b> | <b><i>p</i>-value</b> |
|------------------------------------------------------|------------------------------|------------------------------|-------------------------------|-----------------------|
| PQ1. Diabetes, short term complications              | 58 (0.3%)                    | 118 (0.7%)                   | 345 (2%)                      | <0.0001               |
| PQ2. Perforated appendix                             | 0 (0%)                       | 8 (0.1%)                     | 15 (0.1%)                     | <0.0001               |
| PQ3. Diabetes, long term complications               | 28 (0.1%)                    | 98 (0.6%)                    | 937 (5%)                      | <0.0001               |
| PQ5. Chronic obstructive pulmonary disease or asthma | 51 (0.3%)                    | 293 (2%)                     | 1021 (5%)                     | <0.0001               |
| PQ7. Hypertension                                    | 14 (0.1%)                    | 54 (0.3%)                    | 131 (0.7%)                    | <0.0001               |
| PQ8. Congestive Heart Failure                        | 54 (0.3%)                    | 448 (3%)                     | 2321 (12%)                    | <0.0001               |
| PQ10. Dehydration                                    | 153 (0.8%)                   | 226 (1%)                     | 532 (3%)                      | <0.0001               |
| PQ11. Bacterial Pneumonia                            | 62 (0.3%)                    | 361 (2%)                     | 1136 (6%)                     | <0.0001               |
| PQ12. Urinary Tract Infection                        | 44 (0.2%)                    | 232 (1%)                     | 857 (5%)                      | <0.0001               |
| PQ13. Angina without procedure                       | 7 (0%)                       | 12 (0.1%)                    | 36 (0.2%)                     | <0.0001               |
| PQ14. Uncontrolled diabetes                          | 2 (0%)                       | 14 (0.1%)                    | 77 (0.4%)                     | <0.0001               |
| PQ16. Lower-extremity amputation among diabetics     | 0 (0%)                       | 7 (0%)                       | 334 (2%)                      | <0.0001               |

**eTable 20. Preventable admissions in patients with pancreatic disorders stratified by deciles and presented as 1<sup>th</sup> decile, 5<sup>th</sup> decile, and 10<sup>th</sup> decile.**

| <b>Characteristics</b>                               | <b>1<sup>th</sup> decile</b> | <b>5<sup>th</sup> decile</b> | <b>10<sup>th</sup> decile</b> | <b><i>p</i>-value</b> |
|------------------------------------------------------|------------------------------|------------------------------|-------------------------------|-----------------------|
| PQ1. Diabetes, short term complications              | 107 (1%)                     | 149 (2%)                     | 396 (4%)                      | <0.0001               |
| PQ2. Perforated appendix                             | 3 (0%)                       | 6 (0.1%)                     | 10 (0.1%)                     | 0.08                  |
| PQ3. Diabetes, long term complications               | 48 (0.4%)                    | 58 (0.8%)                    | 566 (6%)                      | <0.0001               |
| PQ5. Chronic obstructive pulmonary disease or asthma | 48 (0.4%)                    | 83 (1%)                      | 439 (5%)                      | <0.0001               |
| PQ7. Hypertension                                    | 25 (0.2%)                    | 22 (0.3%)                    | 88 (0.9%)                     | <0.0001               |
| PQ8. Congestive Heart Failure                        | 22 (0.2%)                    | 55 (0.8%)                    | 524 (5%)                      | <0.0001               |
| PQ10. Dehydration                                    | 133 (1%)                     | 92 (1%)                      | 360 (4%)                      | <0.0001               |
| PQ11. Bacterial Pneumonia                            | 61 (0.6%)                    | 83 (1%)                      | 459 (5%)                      | <0.0001               |
| PQ12. Urinary Tract Infection                        | 69 (0.6%)                    | 78 (1%)                      | 346 (4%)                      | <0.0001               |
| PQ13. Angina without procedure                       | 7 (0.1%)                     | 4 (0.1%)                     | 18 (0.2%)                     | <0.0001               |
| PQ14. Uncontrolled diabetes                          | 34 (0.3%)                    | 16 (0.2%)                    | 113 (1%)                      | <0.0001               |
| PQ16. Lower-extremity amputation among diabetics     | 0 (0%)                       | 1 (0%)                       | 67 (0.7%)                     | <0.0001               |



## **METHODS**

### **Data Sources – Nationwide Readmissions Database**

The NRD is drawn from State Inpatient Databases and contains reliable, verified patient linkage numbers that tracks patients hospitalized within a state, over the course of one year, and contains more than 100 demographic (age, sex, income quartile), clinical (diagnoses and procedure codes, comorbidities), and non-clinical variables (community, academic, urban-rural designation, bed size, expected payment source, hospital charges and costs etc.) from all community hospitals (as defined by the American Hospital Association), public hospitals and academic medical centers, located in 21 geographically diverse states. The NRD captures over 85% of all discharges from these states, which account for 49.3% of the US population.

### **Clinical Classification Software**

CCS for ICD-9-CM is a categorization scheme for diagnoses and procedures which collapses ICD-9-CM's expansive codes – which contains over 14,000 diagnosis codes and 3,900 procedure codes – into smaller number of categories that are both clinically meaningful and more useful for presenting descriptive statistics, and are developed by HCUP.

### **Patient and Hospital Characteristics**

The following patient characteristics were reported: age, sex, primary expected payment source (Medicare, Medicaid, private insurance, self-pay, and other insurance types), income quartile based on the median household income of the patient's ZIP Code, and relevant comorbidities (smoking, obesity, anemia, congestive heart failure, chronic lung disease, depression, diabetes, hypertension, coagulation disorder, liver disorder, electrolyte abnormalities, peripheral vascular disease, psychoses, and renal failure). Hospital characteristics included: location, teaching status, and bed size (small, medium, large).

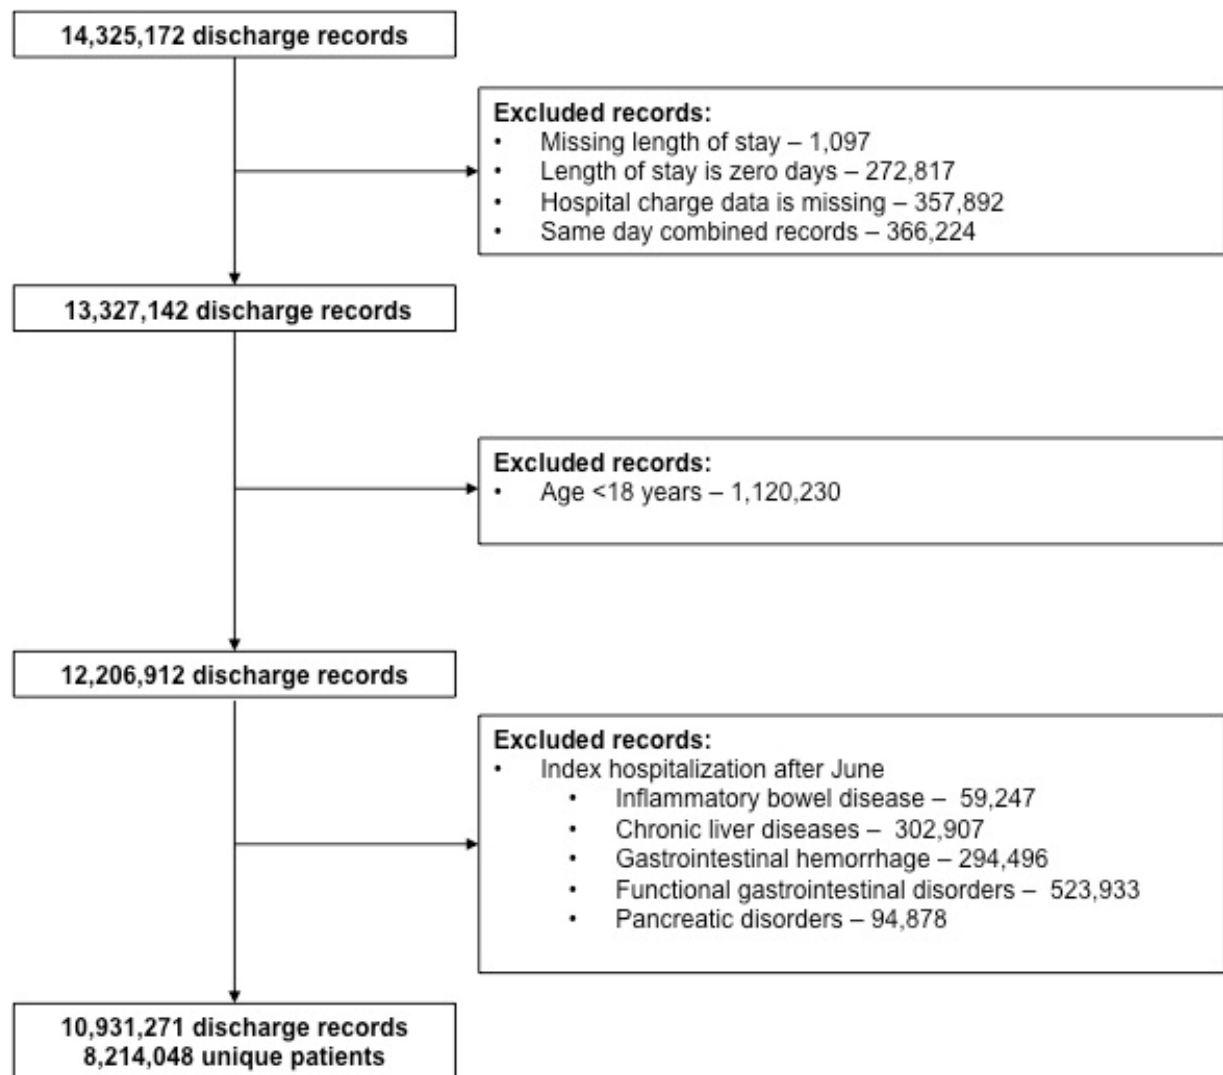

# Inflammatory Bowel Diseases

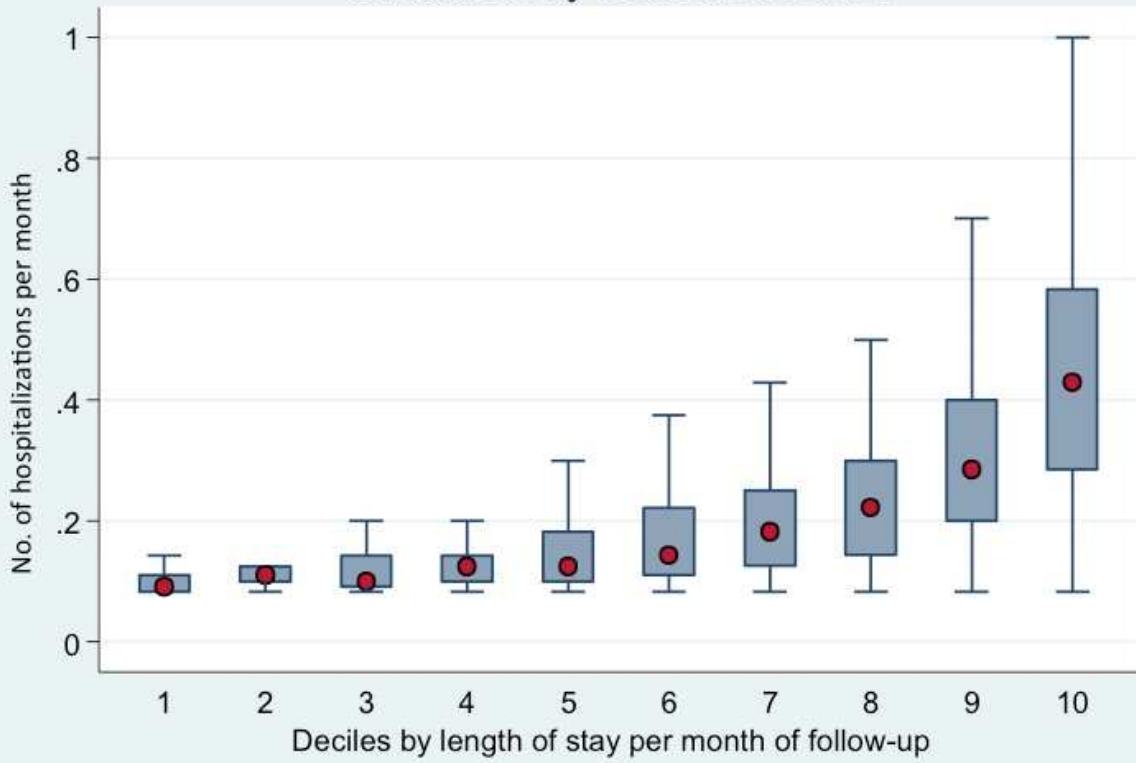

### Chronic Liver Diseases

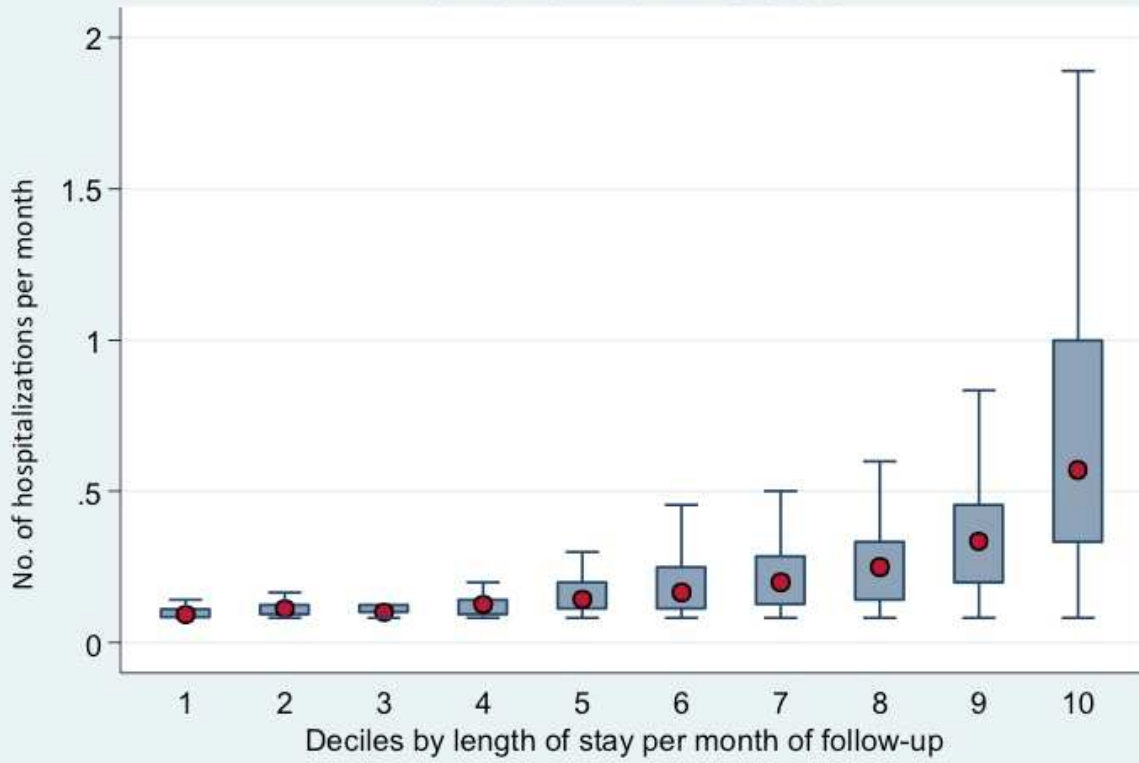

## Functional Gastrointestinal Disorders

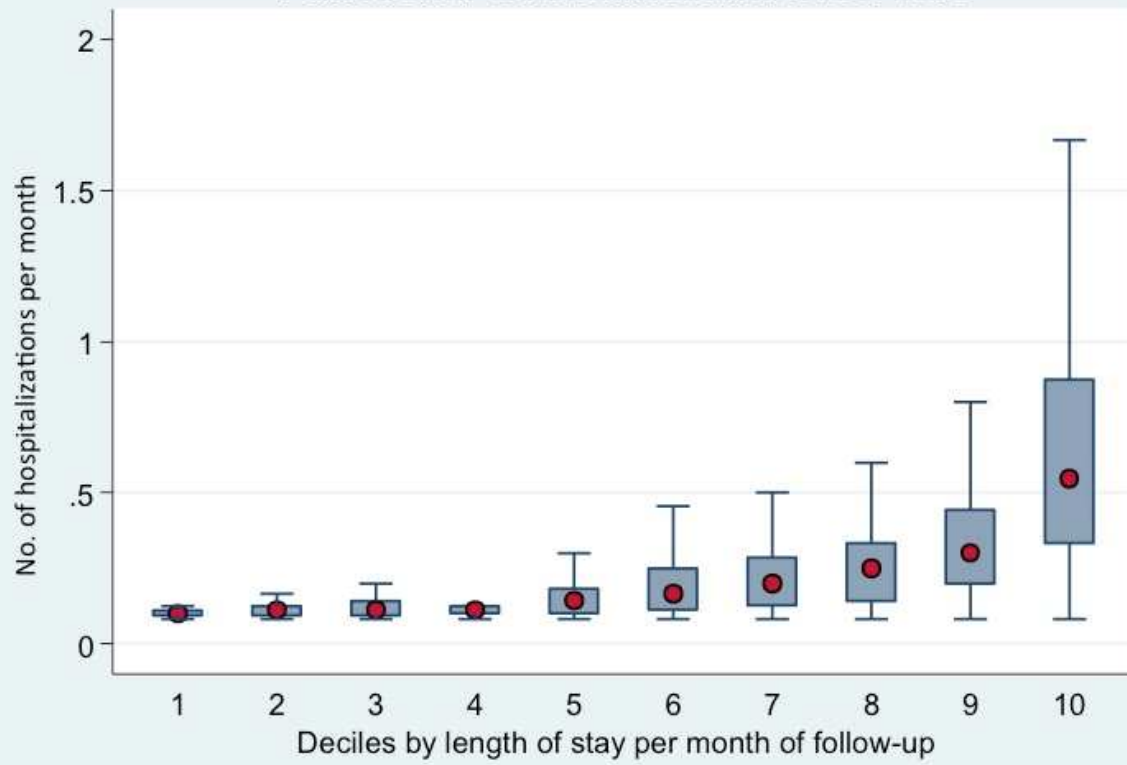

## Gastrointestinal Hemorrhage

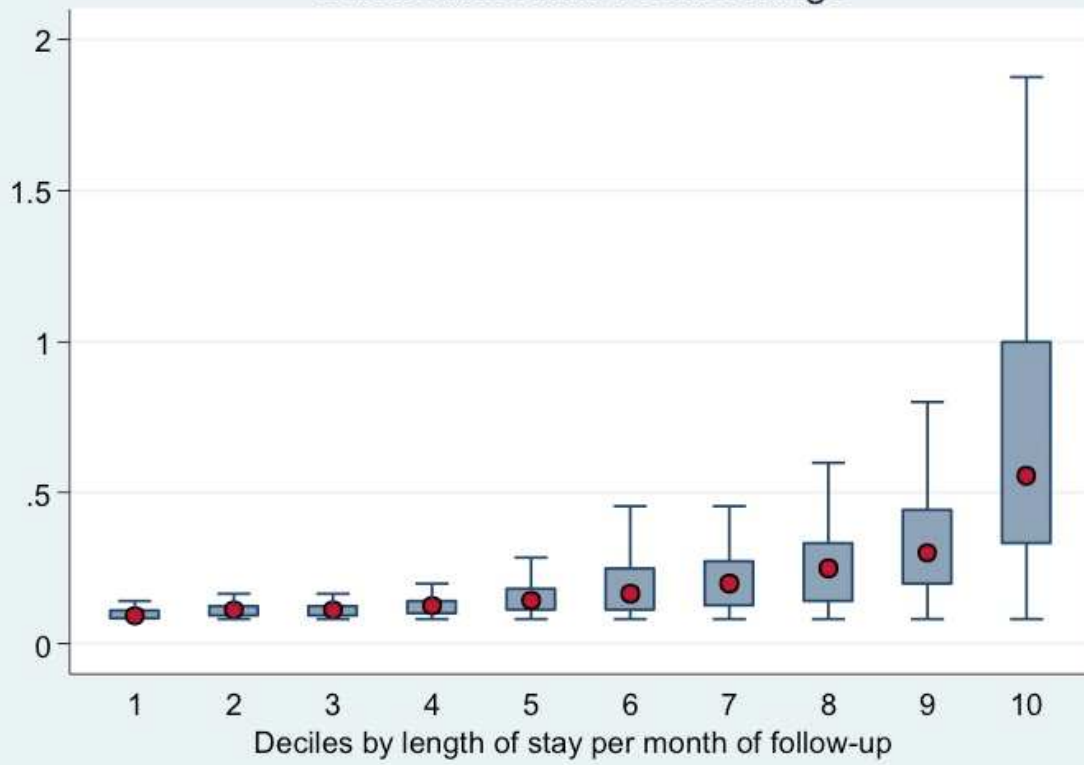

## Pancreatic Disorders

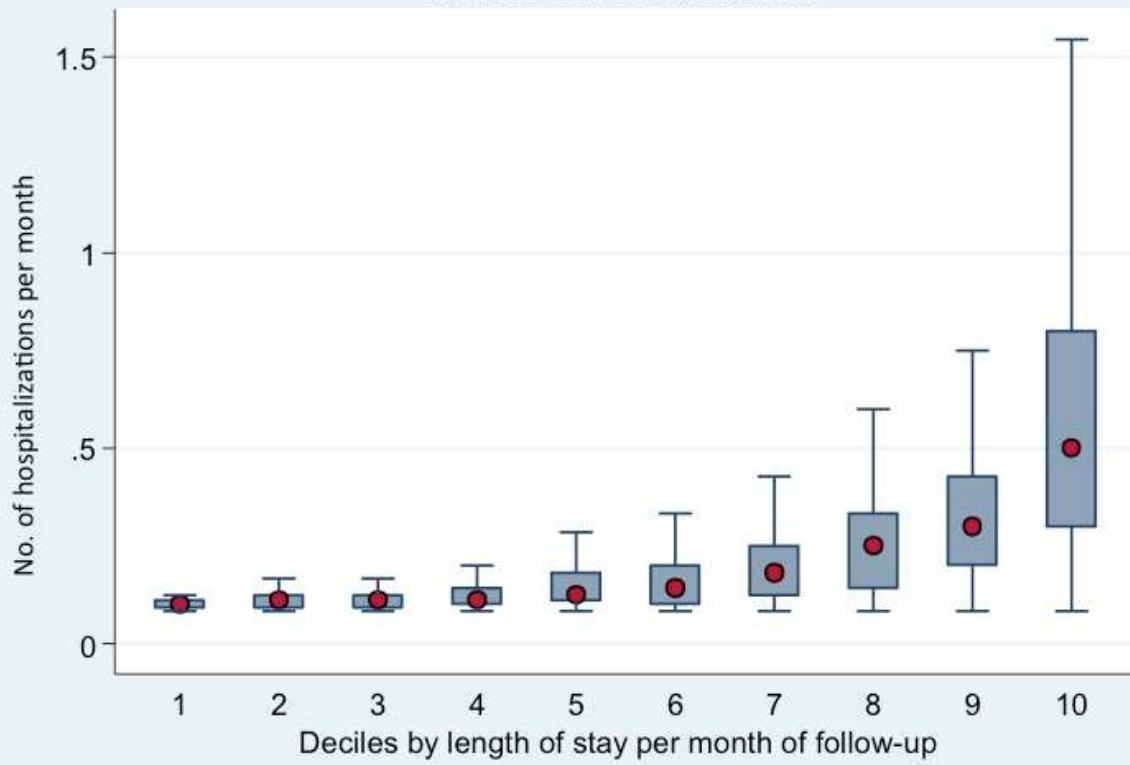

Inflammatory Bowel Diseases - Top Ten Percent of High-Consumers

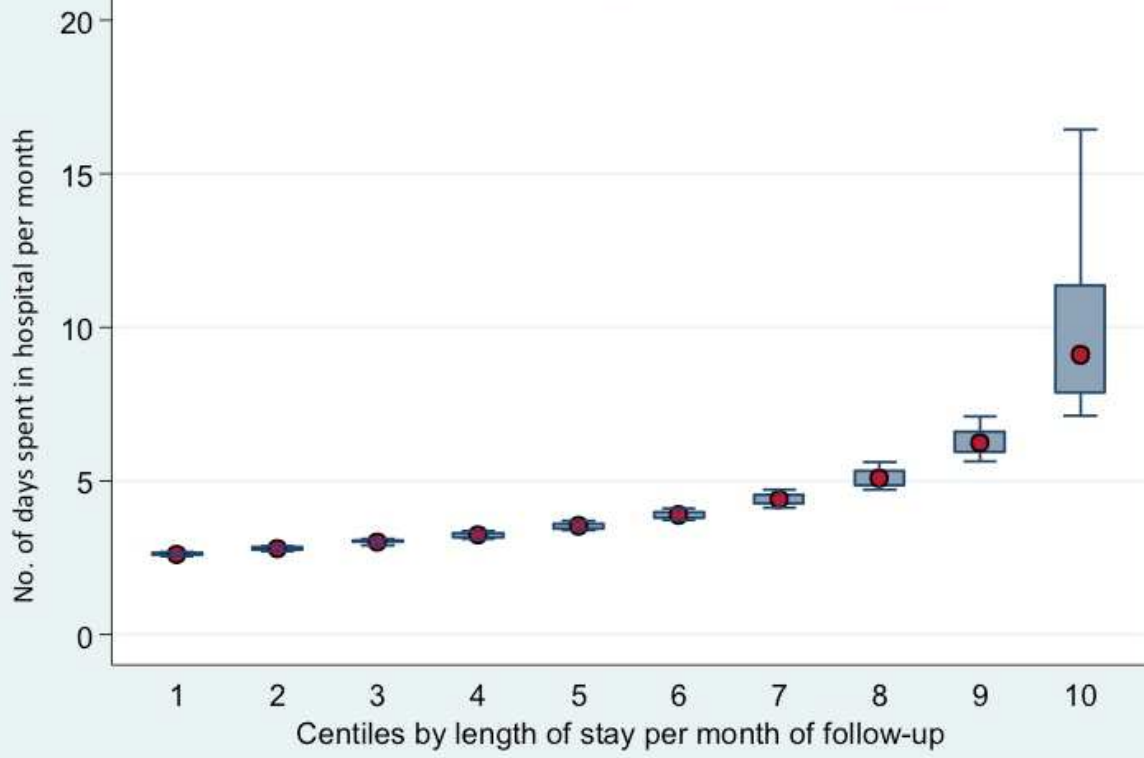



Chronic Liver Diseases - Top Ten Percent of High-Consumers

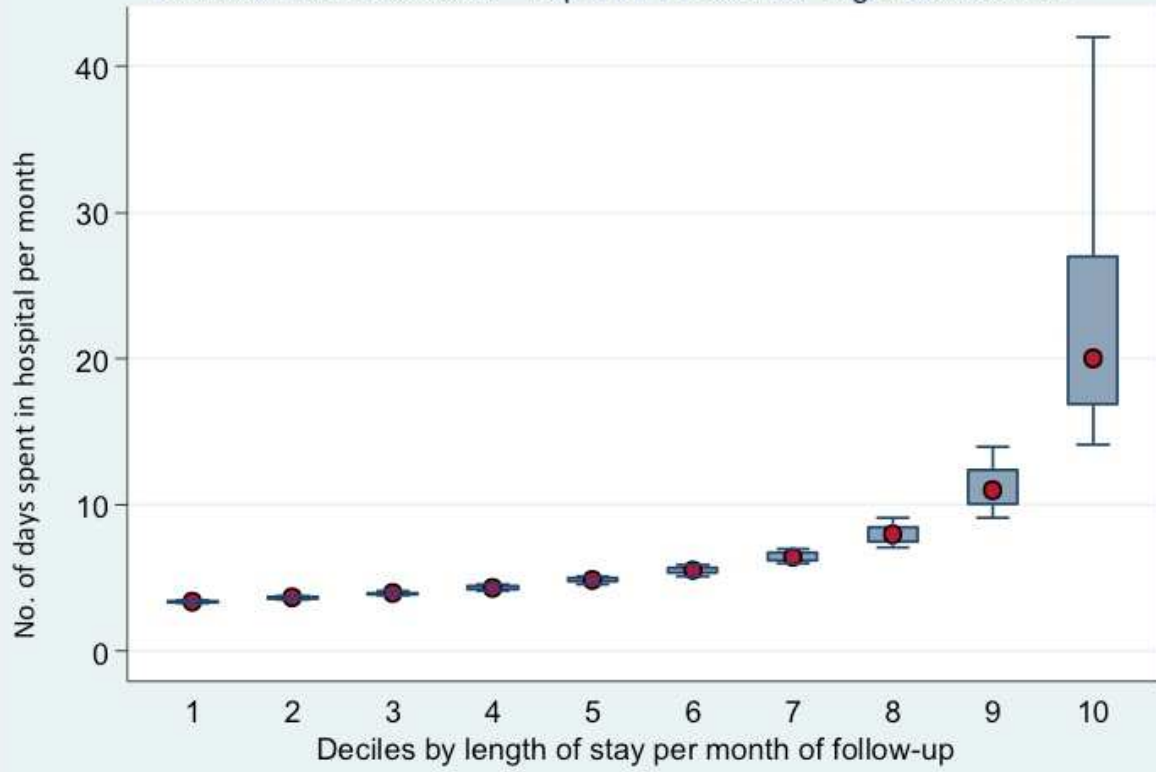

### Functional Gastrointestinal Disorders - Top Ten Percent of High-Consumers

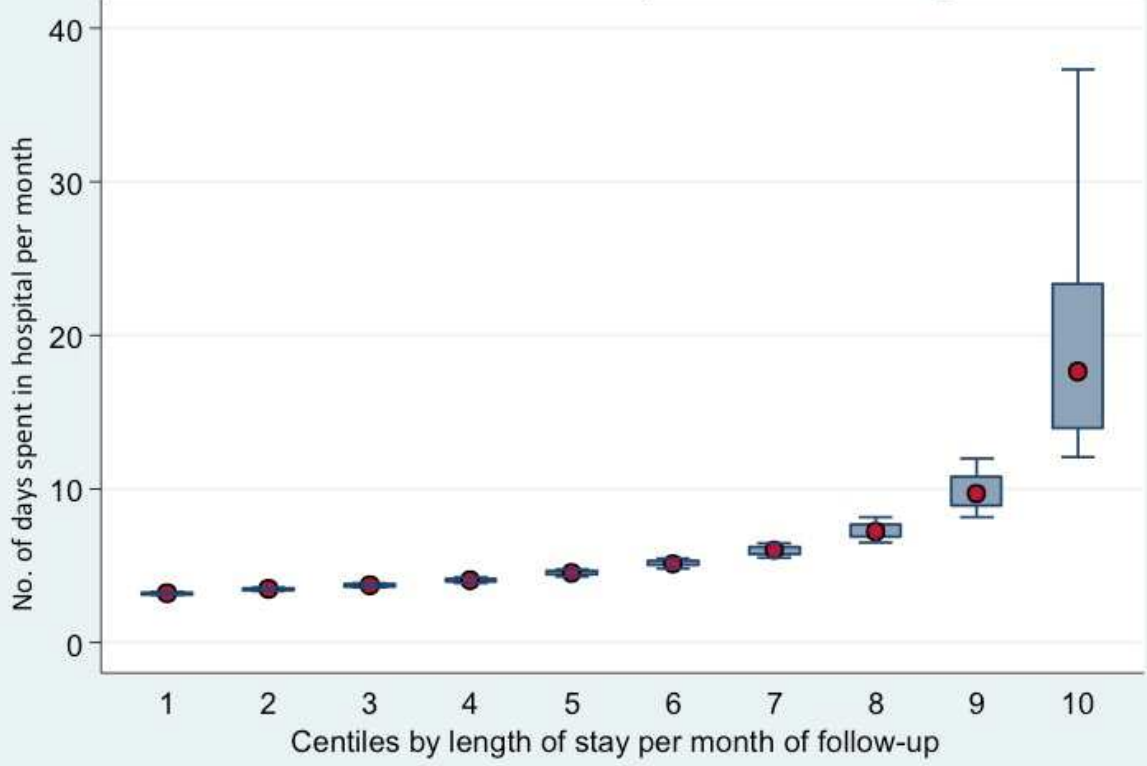

Gastrointestinal Hemorrhage - Top Ten Percent of High-Consumers

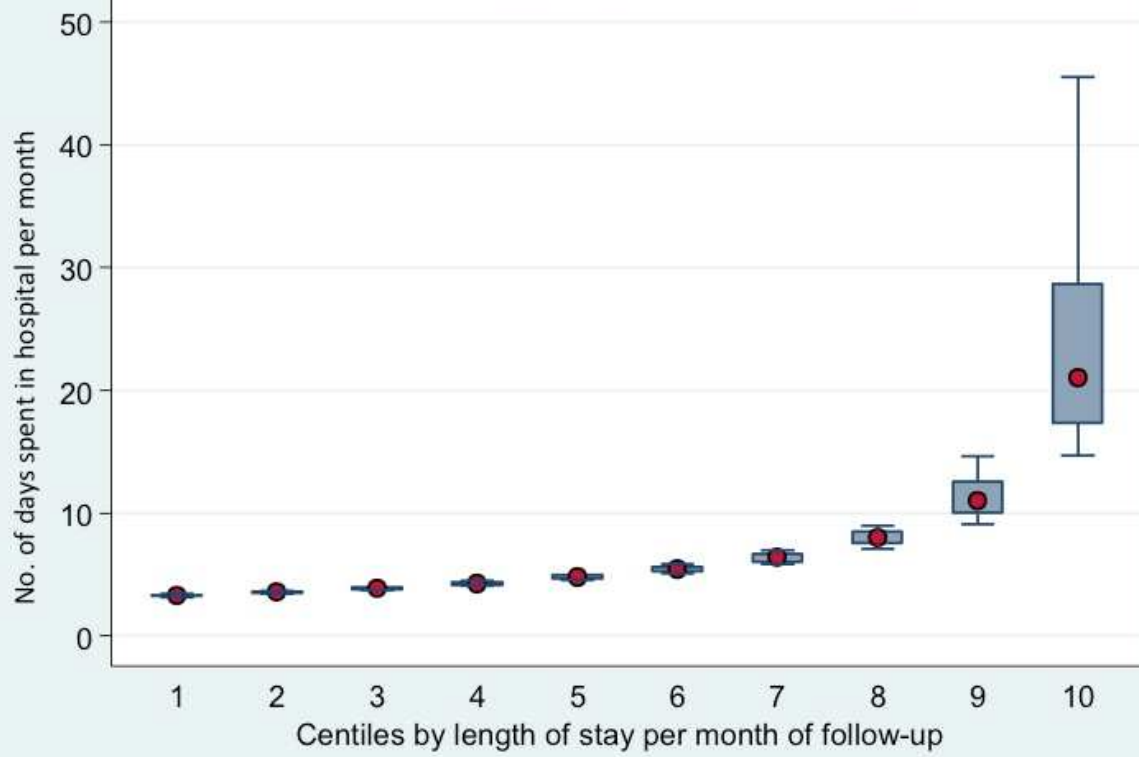

Pancreatic Disorders - Top Ten Percent of High-Consumers

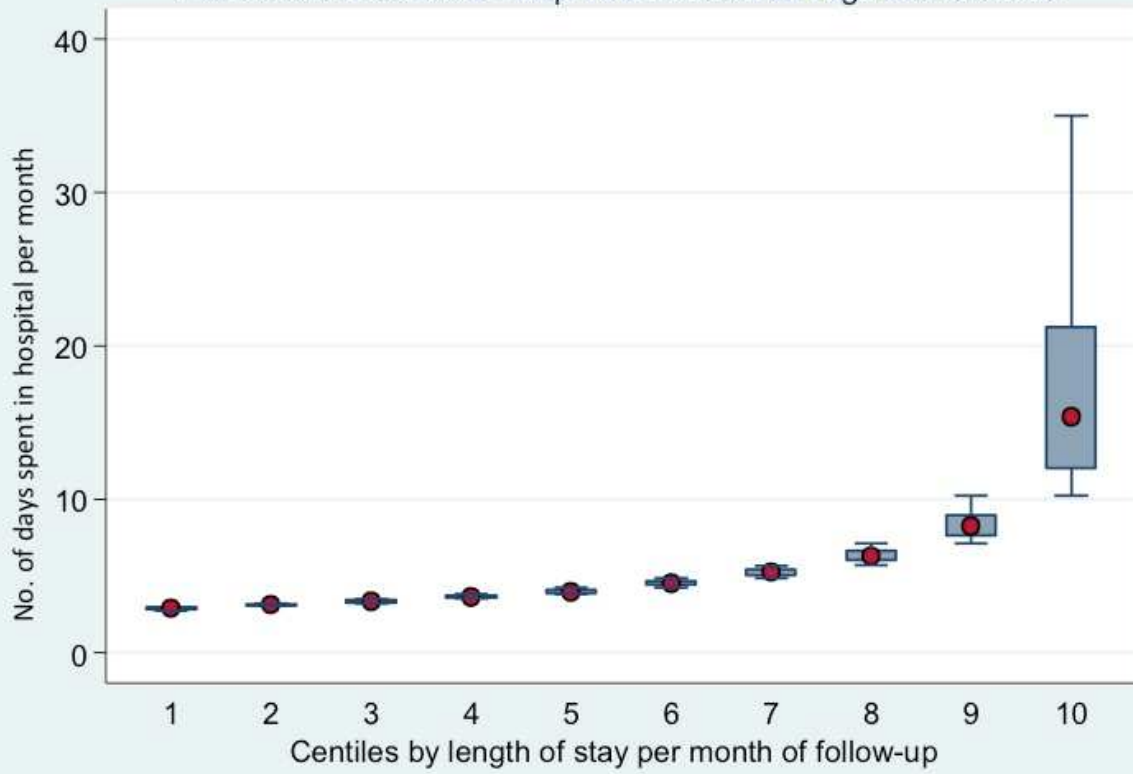

Inflammatory Bowel Diseases - Top Ten Percent of High-Consumers

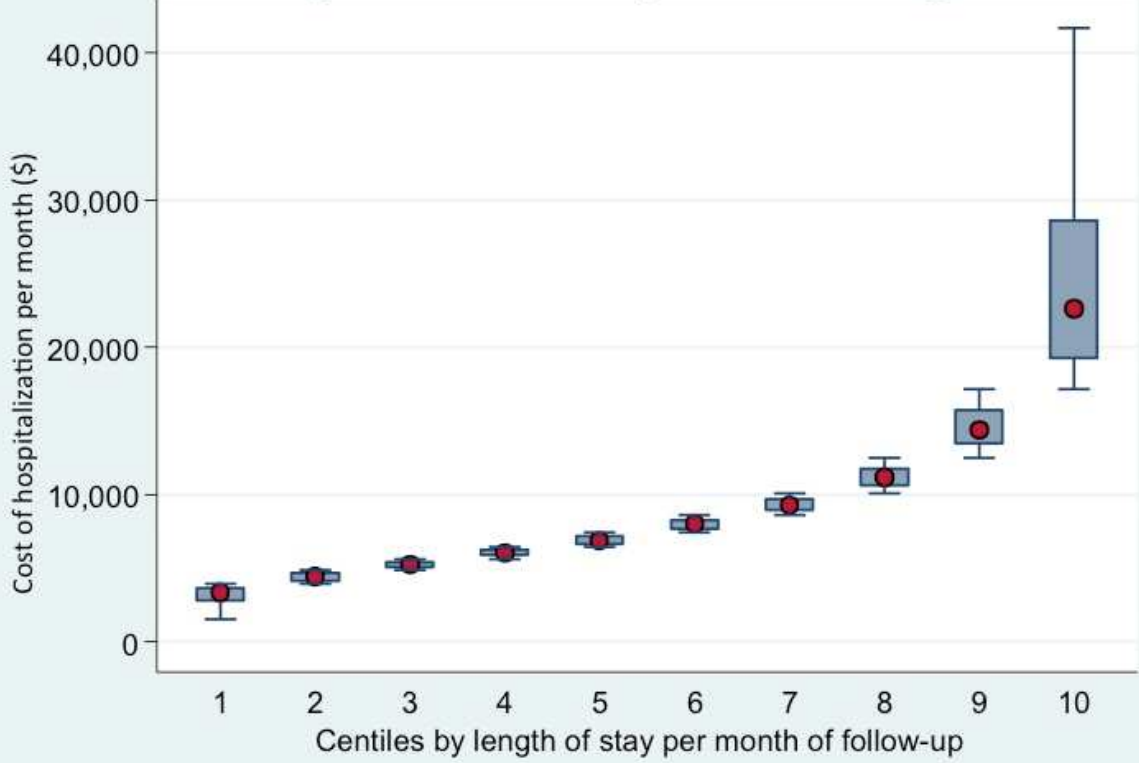

Chronic Liver Diseases - Top Ten Percent of High-Consumers

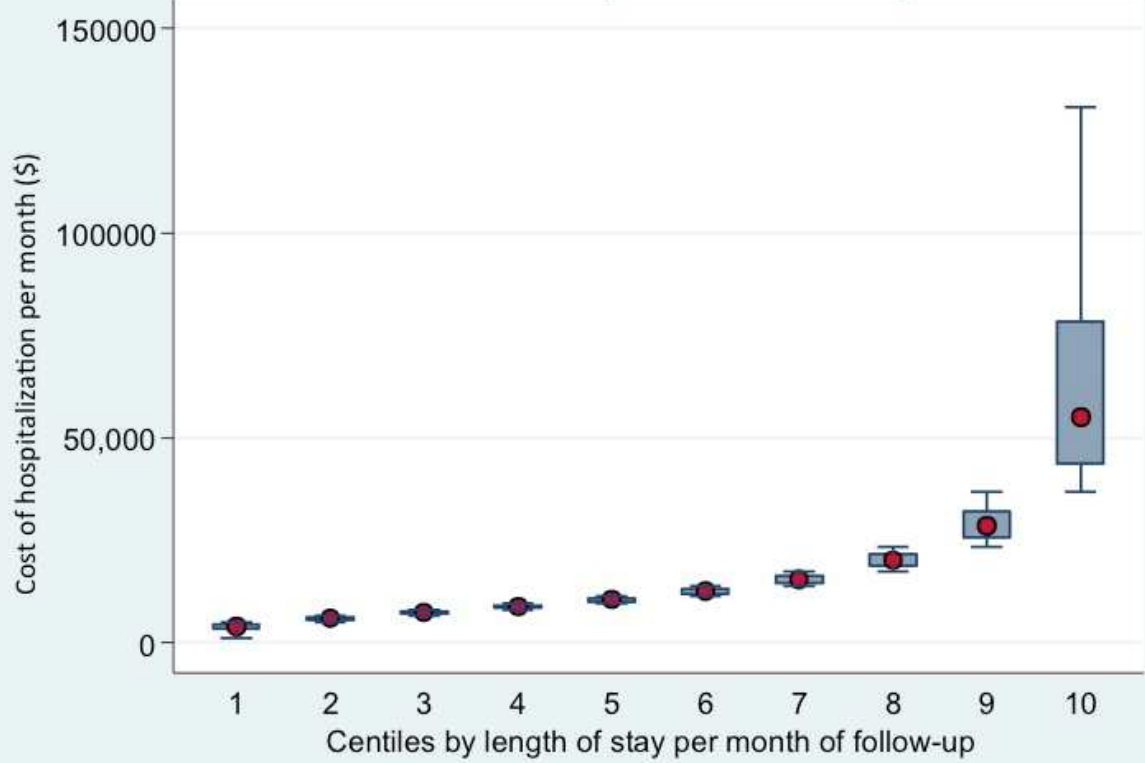

Functional Gastrointestinal Disorders - Top Ten Percent of High-Consumers

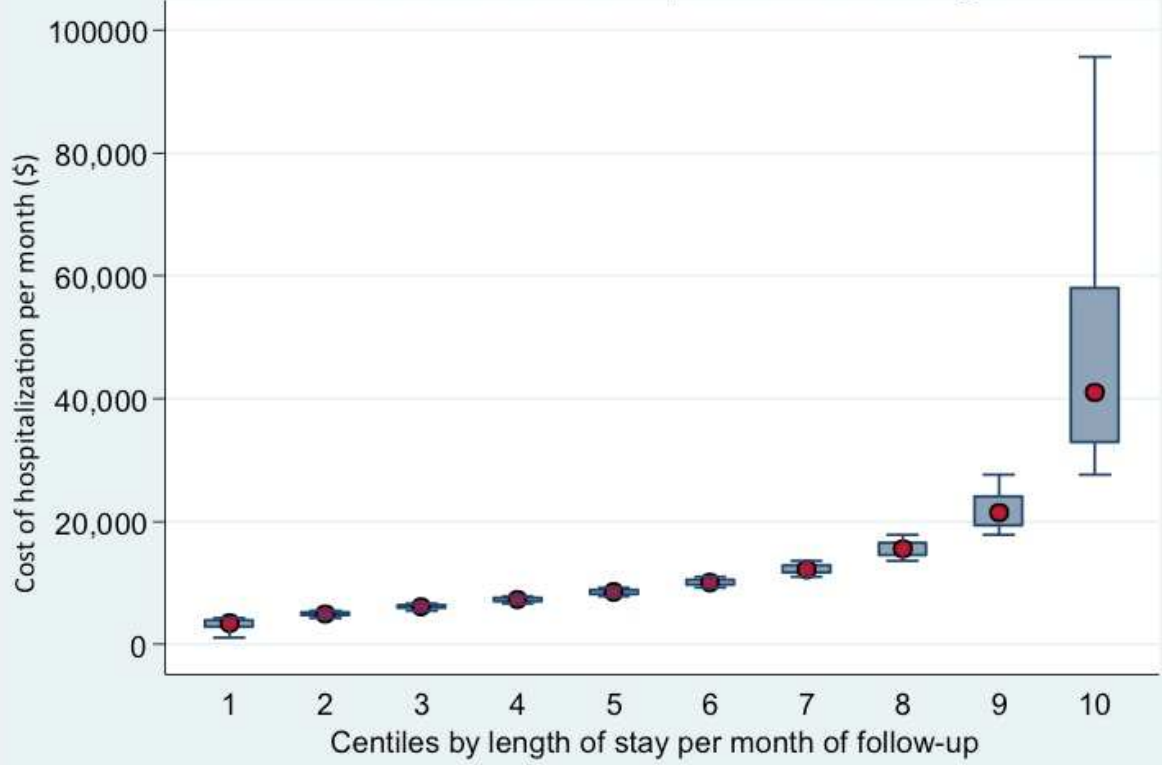

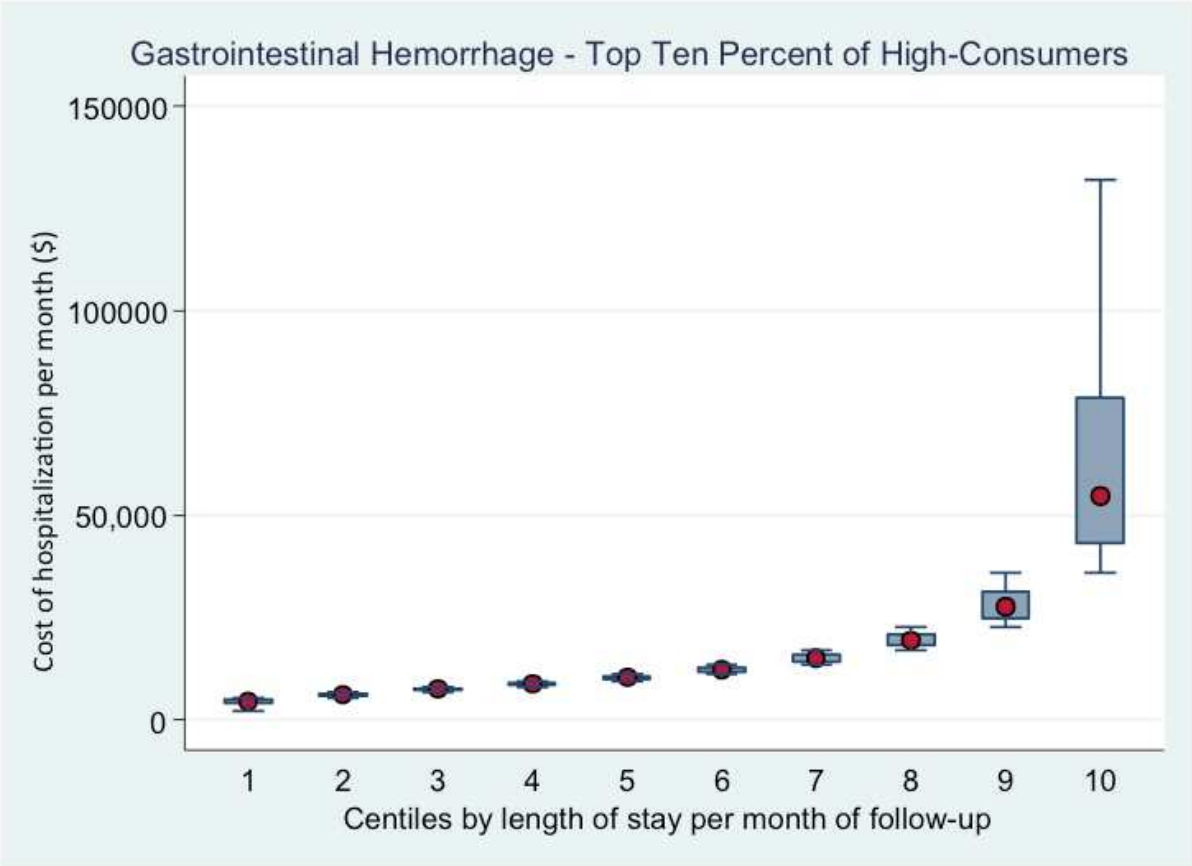



Pancreatic Disorders - Top Ten Percent of High-Consumers

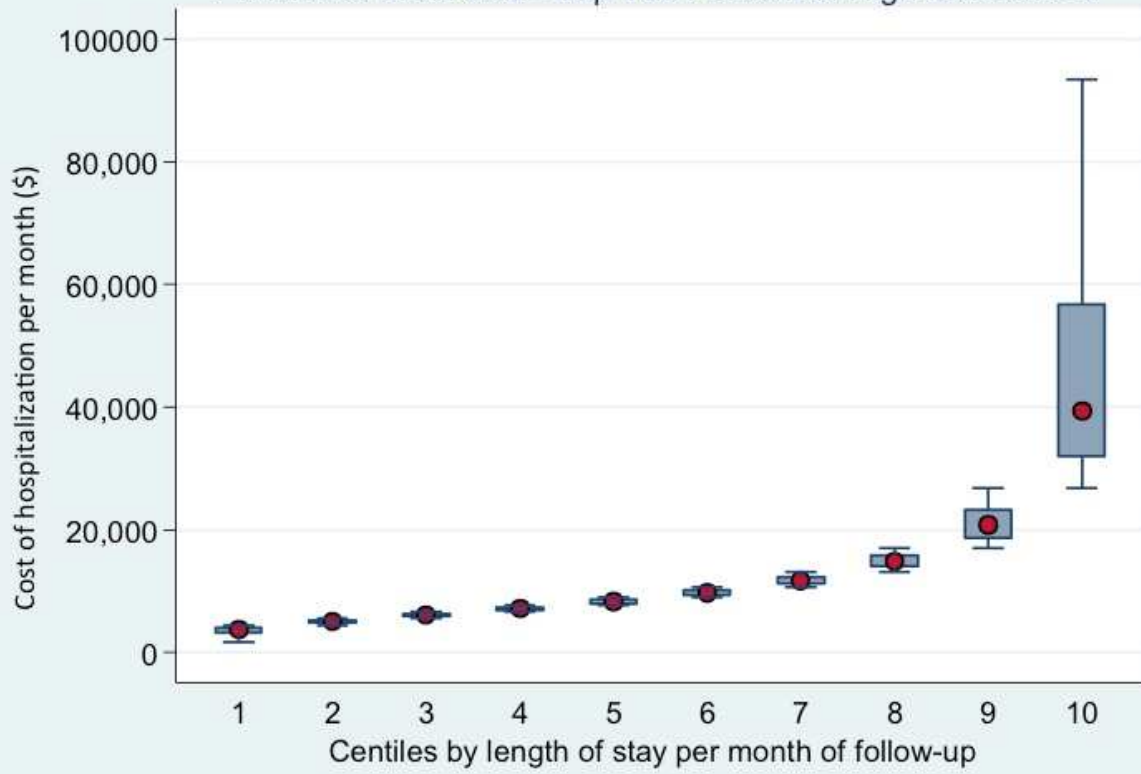

### Inflammatory Bowel Disease - All Cause Readmissions

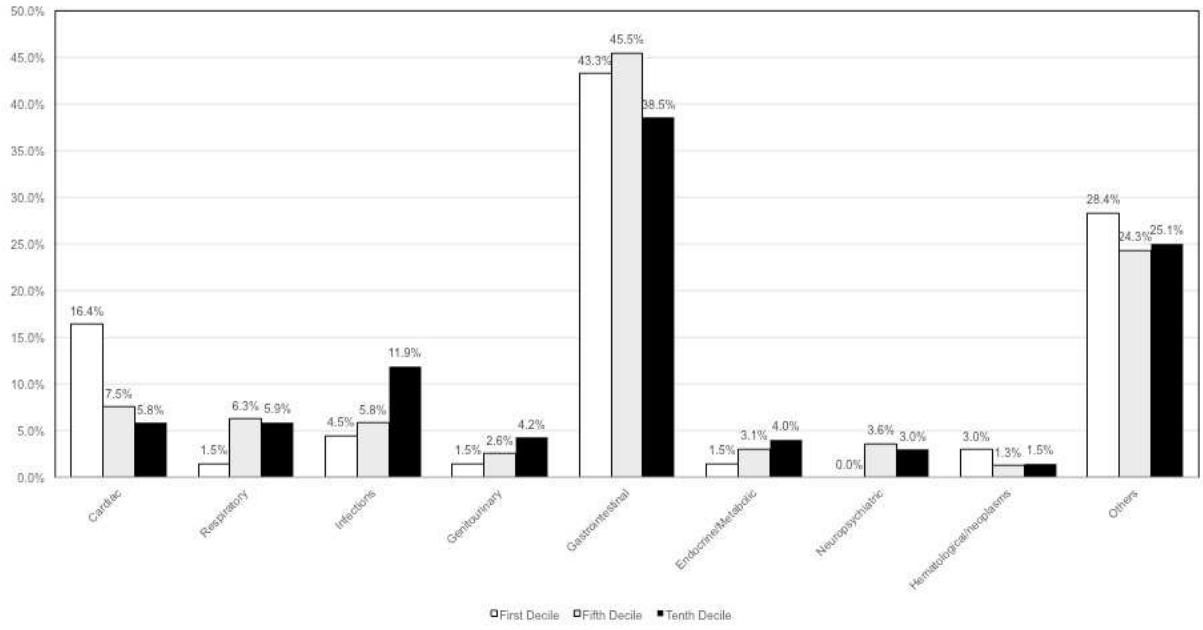

### Chronic Liver Diseases - All Cause Readmissions

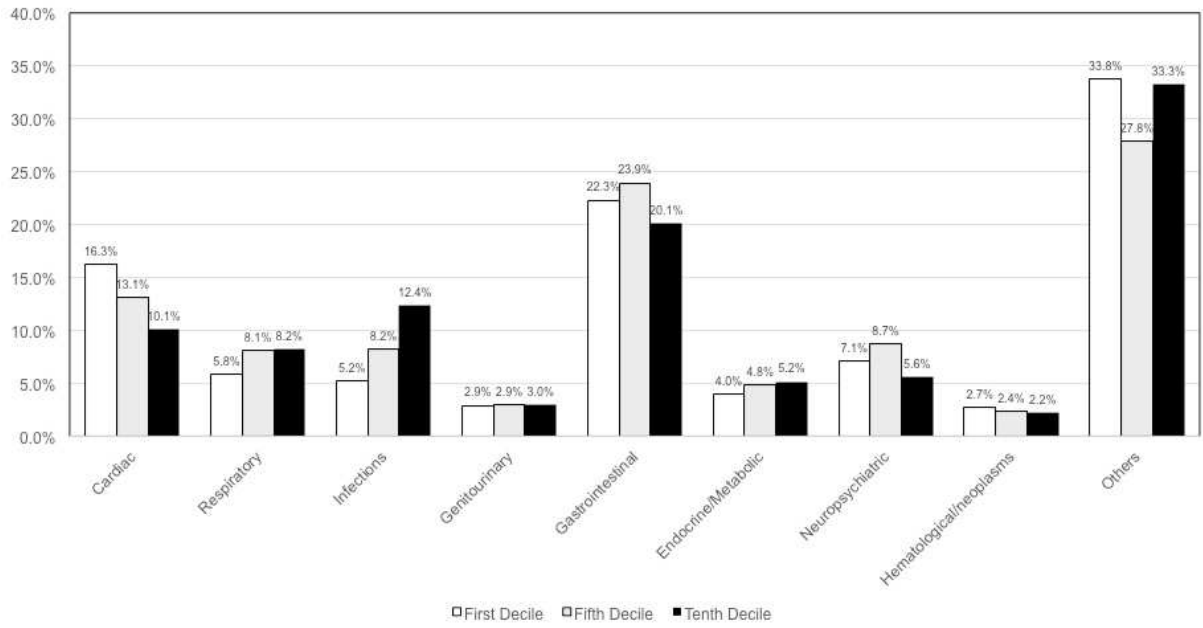

### Functional Gastrointestinal Disorders

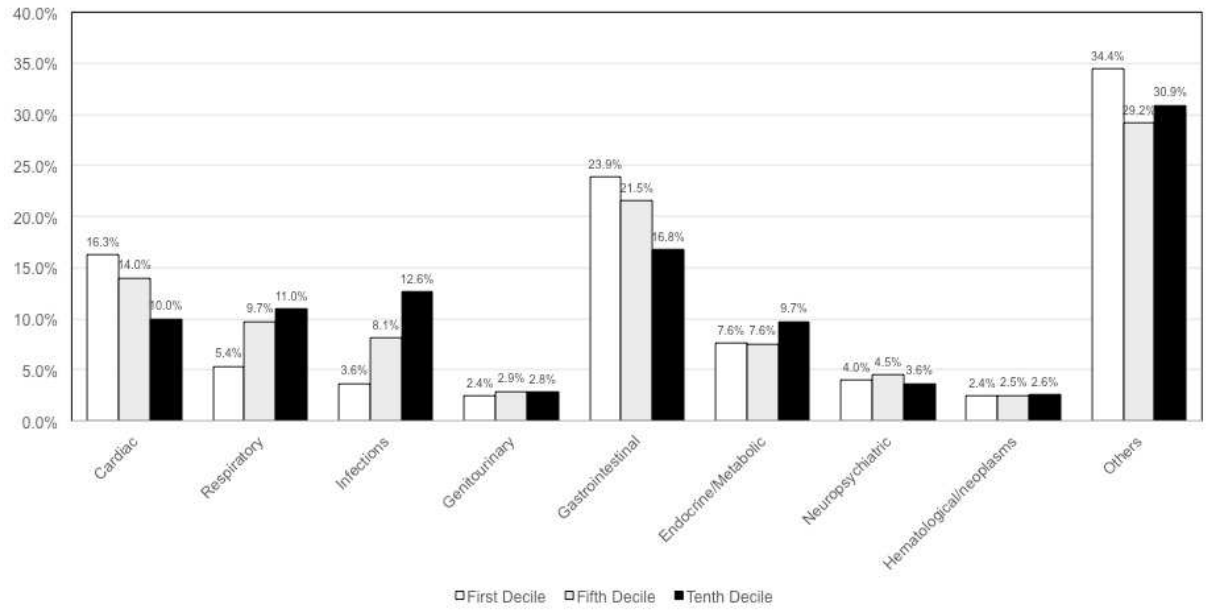

Gastrointestinal Bleed - All Cause Readmissions

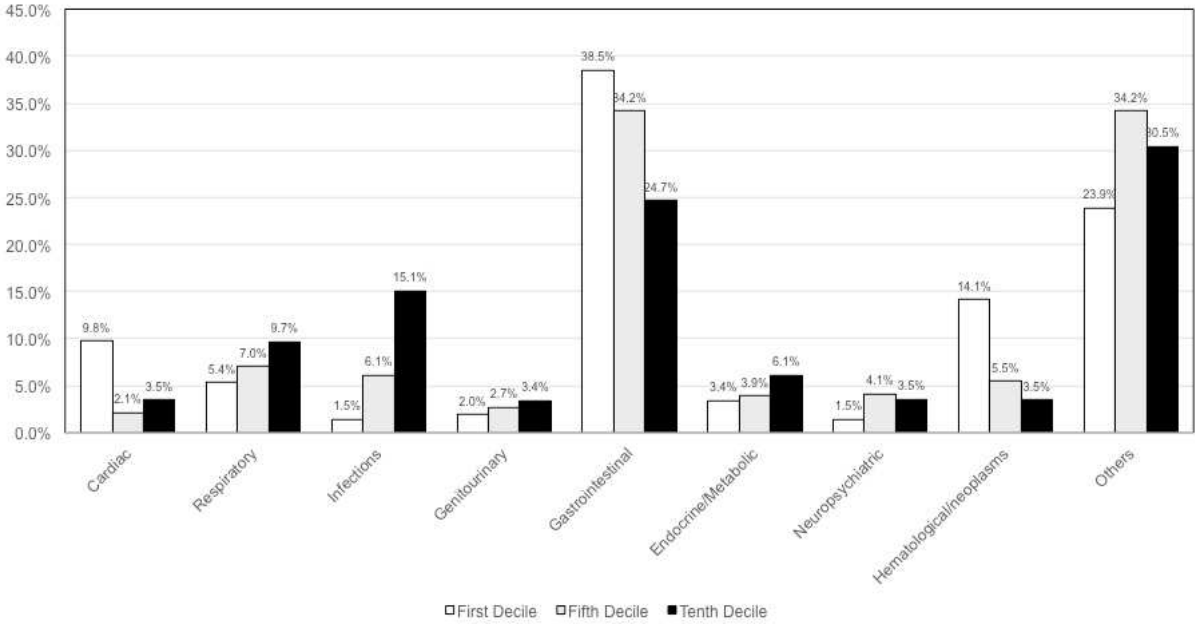

### Pancreatic Disorders - All Cause Readmissions

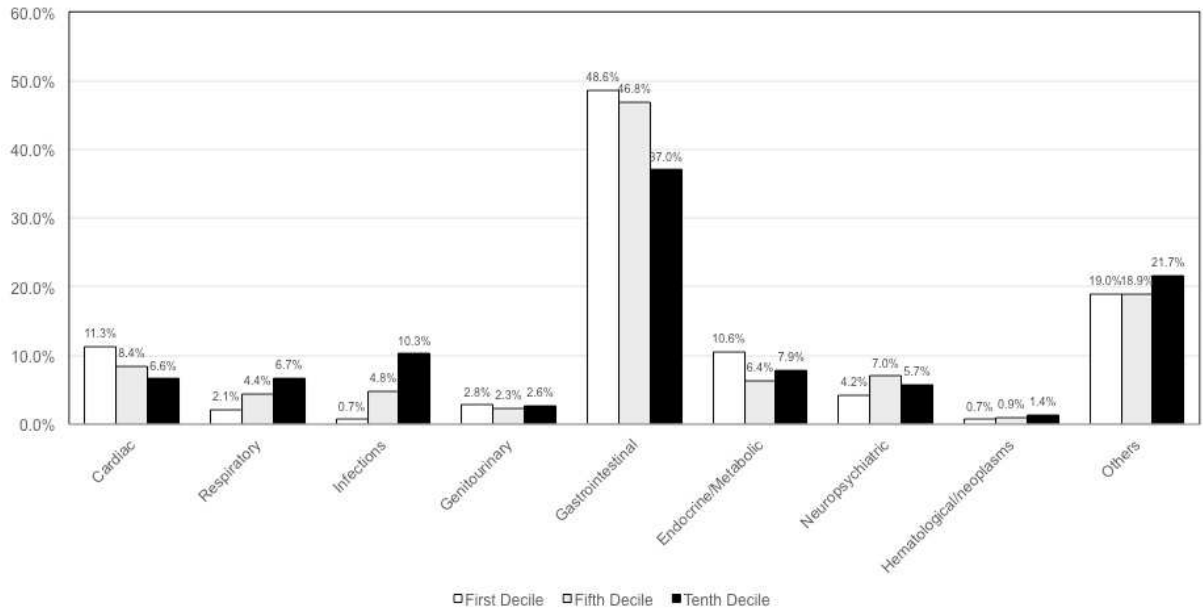

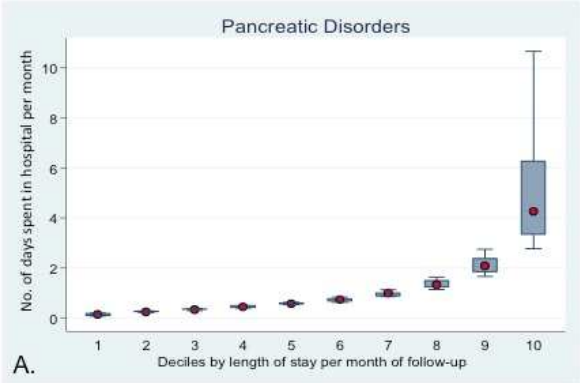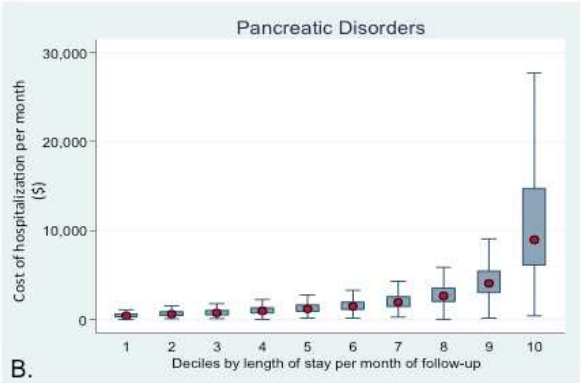

Supplement: NIHMS944816-supplement-supplement_1.pdf [file NIHMS944816-supplement-supplement_1.pdf]
